# Supplementary material
Source: PubMed Central journal article supplement (PMC11492806)

# Supporting Information: Acyl-CoA identification in mouse liver samples using the in-silico CoA-Blast tandem mass spectral library

Uri Keshet<sup>(1)</sup>, Tobias Kind<sup>(1)</sup>, Xinchun Lu<sup>(1,3)</sup>, Sarita Devi<sup>(1,2)</sup>, and Oliver Fiehn<sup>(1)\*</sup>

1. University of California Davis, Genome Center – Metabolomics, Davis 95616, California, U.S.A.
2. St. John’s Research Institute, St. John’s National Academy of Health Sciences, Bangalore, India
3. College of Environmental Sciences and Engineering, Peking University, Beijing 100871, P. R. China

Corresponding author:

Oliver Fiehn, email [ofiehn@ucdavis.edu](mailto:ofiehn@ucdavis.edu)

## Contents

|                                                                                                                                             |    |
|---------------------------------------------------------------------------------------------------------------------------------------------|----|
| Table S1: The 14 authentic Acyl-CoA standards analyzed in the study for MS2 validation and retention time prediction model generation. .... | 3  |
| Table S2: All hits returned from the CoA-Blast library for each annotated peak. ....                                                        | 4  |
| Table S3: The original spectra from which the rules were formulated for CoA-Blast library generation .....                                  | 12 |
| Figure S1: Head to tail MS2 matching results from MS DIAL for the 13 identified acyl-CoAs standards in positive ESI mode (a-m). ....        | 15 |
| Figure S2: Head to tail MS2 matching results from MS DIAL for the 11 identified acyl-CoAs standards in negative ESI mode (a-k). ....        | 17 |
| Figure S3: Head to tail MS2 matching results from MS DIAL for all 23 identified liver acyl-CoAs (a-w). ....                                 | 19 |

**Table S1: The 14 authentic Acyl-CoA standards analyzed in the study for MS2 validation and retention time prediction model generation.**

| <b>Name</b>             | <b>logD</b> | <b>RT short</b> | <b>RT long</b> | <b>Monoisotopic mass</b> | <b>k' short</b> |
|-------------------------|-------------|-----------------|----------------|--------------------------|-----------------|
| <b>malonyl-CoA</b>      | -14.4       | 0.6             | -              | 853.1149                 | 0.3             |
| <b>glutaryl-CoA</b>     | -13.63      | 1.9             | -              | 881.1462                 | 3.2             |
| <b>Free CoA</b>         | -11.44      | 0.66            | -              | 767.1146                 | 0.5             |
| <b>acetyl-CoA</b>       | -11.49      | 2               | -              | 809.1251                 | 3.4             |
| <b>propionyl-CoA</b>    | -10.79      | 3.28            | 0.49           | 823.1407                 | 6.3             |
| <b>butyryl-CoA</b>      | -10.35      | 3.73            | 0.54           | 837.1564                 | 7.3             |
| <b>isovaleryl-CoA</b>   | -10.06      | 3.9             | 0.54           | 851.172                  | 7.7             |
| <b>hexanoyl-CoA</b>     | -9.46       | 4.7             | 0.57           | 865.1877                 | 9.4             |
| <b>octanoyl-CoA</b>     | -8.57       | 6.1             | 1.65           | 893.219                  | 12.6            |
| <b>Decanoyl-CoA</b>     | -7.68       | 7.01            | 3.06           | 921.2503                 | 14.6            |
| <b>myristoyl-CoA</b>    | -5.9        | 8.25            | 3.58           | 977.3129                 | 17.3            |
| <b>Arachidonoyl-CoA</b> | -4.79       | 8.55            | 3.7            | 1053.344                 | 18.0            |
| <b>heptadeca-CoA</b>    | -4.57       | 9.03            | 3.92           | 1019.36                  | 19.1            |
| <b>stearoyl-CoA</b>     | -4.12       | 9.28            | 3.97           | 1041.325                 | 19.6            |

**Table S2: All hits returned from the CoA-Blast library for each annotated peak.**

The ChemSpider result from elemental formula search is given for each hit, together with the number of different data sources found on ChemSpider for each annotation. These numbers were used to determine the most biologically relevant library hit for annotation.

| # | # in Library | Name in Library                                         | logD[pH=6.8] | theoretical precursor M/Z | smiles from Library                                                                                                   | ChemSpider result | # of data sources | # of references | # of PubMed | # of RSC | comments                  |
|---|--------------|---------------------------------------------------------|--------------|---------------------------|-----------------------------------------------------------------------------------------------------------------------|-------------------|-------------------|-----------------|-------------|----------|---------------------------|
| 1 | 21           | PubChem CID: 20758225; (Acyl-CoA); [M+H] <sup>+</sup> ; | -11.72       | 768.1225                  | CC(C)(CC(O)C(=O)NCCC(=O)NCCS)OP(O)(=O)OP(O)(=O)OCC1OC(C(O)C1OP(O)(O)=O)n1cnc2c(N)ncnc12                               | -                 |                   |                 |             |          | Not a CoA                 |
|   | 22           | Reduced CoA; (Acyl-CoA); [M+H] <sup>+</sup> ;           | -11.44       | 768.1225                  | CC(C)(COP(O)(=O)OP(O)(=O)OC[C@H]1O[C@H]([C@H](O)[C@@H]1OP(O)(O)=O)n1cnc2c(N)ncnc12)C(O)C(=O)NCCC(=O)NCCS              | Coenzyme A        | 42                | 656             | 13328       | 943      |                           |
|   | 20           | CID44783 1; (Acyl-CoA); [M+H] <sup>+</sup> ;            | -12.16       | 768.1320                  | CC(C)(COP(O)(=O)OP(O)(=O)OC[C@H]1O[C@H]([C@H](O)[C@@H]1OP(O)(O)=O)n1cnc2c(N)ncnc12)[C@@H](O)C(=O)NCCC(=O)NCCP         | -                 |                   |                 |             |          | Not a CoA (has no S atom) |
| 2 | 52           | acetyl-CoA; (Acyl-CoA); [M+H] <sup>+</sup> ;            | -11.60       | 810.1331                  | CC(=O)SCCNC(=O)CCNC(=O)[C@@H](O)C(C)(C)COP(O)(=O)OP(O)(=O)OC[C@H]1O[C@H]([C@H](O)[C@@H]1OP(O)(O)=O)n1cnc2c(N)ncnc12   | Acetyl-CoA        | 42                | 291             | 8216        | 779      |                           |
| 3 | 65           | SOP; (Acyl-CoA); [M+H] <sup>+</sup> ;                   | -11.46       | 824.1487                  | C\C(O)=C/SCCNC(=O)CCNC(=O)[C@H](O)C(C)(C)COP(O)(=O)OP(O)(=O)OC[C@H]1O[C@H]([C@H](O)[C@@H]1OP(O)(O)=O)n1cnc2c(N)ncnc12 | Not an acyl CoA   |                   |                 |             |          |                           |
|   | 66           | PubChem CID: 24762924; (Acyl-CoA); [M+H] <sup>+</sup> ; | -11.56       | 824.1487                  | CC(=O)CSCCNC(=O)CCNC(=O)[C@@H](O)C(C)(C)COP(O)(=O)OP(O)(=O)OC[C@H]1O[C@H]([C@H](O)[C@@H]1OP(O)(O)=O)n1cnc2c(N)ncnc12  | S-Acetyl coa      | 6                 | 8               | 0           | 0        |                           |
|   | 67           | CID10581 308; (Acyl-CoA); [M+H] <sup>+</sup> ;          | -10.94       | 824.1487                  | CSC(=O)CCCNC(=O)CCNC(=O)[C@H](O)C(C)(C)COP(O)(=O)OP(O)(=O)OC[C@H]1O[C@H]([C@H](O)[C@@H]1OP(O)(O)=O)n1cnc2c(N)ncnc12   | -                 |                   |                 |             |          | Not a CoA                 |
|   | 68           | propanoyl-CoA; (Acyl-CoA); [M+H] <sup>+</sup> ;         | -10.90       | 824.1487                  | CCC(=O)SCCNC(=O)CCNC(=O)C(O)C(C)(C)COP(O)(=O)OP(O)(=O)OC[C@H]1O[C@H]([C@H](O)[C@@H]1OP(O)(O)=O)n1cnc2c(N)ncnc12       | Propionyl CoA     | 20                | 46              | 0           | 0        |                           |
|   | 69           | S-Acetyl CoA;                                           | -11.56       | 824.1487                  | CC(=O)CSCCNC(=O)CCNC(=O)[C@H](O)C(C)(C)COP(O)(=O)OP(O)(=O)OC[C@H]1O[C@H]([C@H](O)[C@@H]1OP(O)(O)=O)n1cnc2c(N)ncnc12   | S-Acetyl CoA      | 6                 | 8               | 0           | 0        |                           |

|   |     |                                                        |        |          |                                                                                                                           |                     |    |    |     |    |  |  |  |  |                                                  |
|---|-----|--------------------------------------------------------|--------|----------|---------------------------------------------------------------------------------------------------------------------------|---------------------|----|----|-----|----|--|--|--|--|--------------------------------------------------|
|   |     | (Acyl-CoA); [M+H] <sup>+</sup> ;                       |        |          |                                                                                                                           |                     |    |    |     |    |  |  |  |  |                                                  |
|   | 70  | propionyl-coenzyme A; (Acyl-CoA); [M+H] <sup>+</sup> ; | -10.90 | 824.1487 | CCC(=O)SCCNC(=O)CCNC(=O)[C@H](O)C(C)(C)COP(O)(=O)OP(O)(=O)OC[C@H]1O[C@H]([C@H](O)[C@@H]1OP(O)(O)=O)n1cnc2c(N)ncnc12       | Propionyl CoA       | 20 | 46 | 0   | 0  |  |  |  |  |                                                  |
| 4 | 86  | isobutyryl-CoA; (Acyl-CoA); [M+H] <sup>+</sup> ;       | -10.36 | 838.1643 | CC(C)C(=O)SCCNC(=O)CCNC(=O)C(O)C(C)(C)COP(O)(=O)OP(O)(=O)OC[C@H]1O[C@H]([C@H](O)[C@@H]1OP(O)(O)=O)n1cnc2c(N)ncnc12        | Isobutyryl CoA      | 19 | 31 | 97  | 44 |  |  |  |  |                                                  |
|   | 87  | S-(3-Oxobutyl) CoA; (Acyl-CoA); [M+H] <sup>+</sup> ;   | -11.12 | 838.1643 | CC(=O)CCSCCNC(=O)CCNC(=O)[C@H](O)C(C)(C)COP(O)(=O)OP(O)(=O)OC[C@H]1O[C@H]([C@H](O)[C@@H]1OP(O)(O)=O)n1cnc2c(N)ncnc12      | Not an acyl CoA     | 4  | 4  | 0   | 0  |  |  |  |  |                                                  |
|   | 88  | butyryl-CoA; (Acyl-CoA); [M+H] <sup>+</sup> ;          | -10.46 | 838.1643 | CCCC(=O)SCCNC(=O)CCNC(=O)[C@H](O)C(C)(C)COP(O)(=O)OP(O)(=O)OC[C@H]1O[C@H]([C@H](O)[C@@H]1OP(O)(O)=O)n1cnc2c(N)ncnc12      | butyryl-CoA         | 15 | 21 | 312 | 49 |  |  |  |  |                                                  |
| 5 | 118 | Pivalyl-CoA; (Acyl-CoA); [M+H] <sup>+</sup> ;          | -9.80  | 852.1800 | CC(C)(C)C(=O)SCCNC(=O)CCNC(=O)[C@H](O)C(C)(C)COP(O)(=O)OP(O)(=O)OC[C@H]1O[C@H]([C@H](O)[C@@H]1OP(O)(O)=O)n1cnc2c(N)ncnc12 | Pivalyl-CoA         | 7  | 7  | 0   | 0  |  |  |  |  |                                                  |
|   | 119 | isovaleryl-CoA; (Acyl-CoA); [M+H] <sup>+</sup> ;       | -10.17 | 852.1800 | CC(C)CC(=O)SCCNC(=O)CCNC(=O)C(O)C(C)(C)COP(O)(=O)OP(O)(=O)OC[C@H]1O[C@H]([C@H](O)[C@@H]1OP(O)(O)=O)n1cnc2c(N)ncnc12       | isovaleryl-CoA      | 15 | 22 | 169 | 19 |  |  |  |  |                                                  |
|   | 120 | 2-methylbutyryl-CoA; (Acyl-CoA); [M+H] <sup>+</sup> ;  | -9.91  | 852.1800 | CCC(C)C(=O)SCCNC(=O)CCNC(=O)C(O)C(C)(C)COP(O)(=O)OP(O)(=O)OC[C@H]1O[C@H]([C@H](O)[C@@H]1OP(O)(O)=O)n1cnc2c(N)ncnc12       | 2-methylbutyryl-CoA | 7  | 9  | 3   | 3  |  |  |  |  |                                                  |
|   | 121 | Pentanoyl-CoA; (Acyl-CoA); [M+H] <sup>+</sup> ;        | -10.01 | 852.1800 | CCCCC(=O)SCCNC(=O)CCNC(=O)C(O)C(C)(C)COP(O)(=O)OP(O)(=O)OC[C@H]1O[C@H]([C@H](O)[C@@H]1OP(O)(O)=O)n1cnc2c(N)ncnc12         | Pentanoyl-CoA       | 6  | 6  | 0   | 0  |  |  |  |  |                                                  |
|   | 122 | Valeryl-CoA; (Acyl-CoA); [M+H] <sup>+</sup> ;          | -10.17 | 852.1800 | CC(C)CC(=O)SCCNC(=O)CCNC(=O)C(O)C(C)(C)COP(O)(=O)OP(O)(=O)OCC1OC(C(O)C1OP(O)(O)=O)n1cnc2c(N)ncnc12                        | -                   |    |    |     |    |  |  |  |  | Also isovaleryl-CoA, synonym is wrong in Pubchem |

|   |     |                                                               |        |          |                                                                                                                             |                       |    |    |   |   |                                                           |
|---|-----|---------------------------------------------------------------|--------|----------|-----------------------------------------------------------------------------------------------------------------------------|-----------------------|----|----|---|---|-----------------------------------------------------------|
| 6 | 128 | 3-Hydroxyisobutyryl-CoA; (Acyl-CoA); [M+H] <sup>+</sup> ;     | -11.64 | 854.1592 | CC(CO)C(=O)SCCNC(=O)CCNC(=O)[C@H](O)C(C)(C)COP(O)(=O)OP(O)(=O)OC[C@H]1O[C@H]([C@H](O)[C@@H]1OP(O)(O)=O)n1cnc2c(N)ncnc12     | 3-hydroxybutyryl-CoA  | 5  | 5  | 0 | 0 |                                                           |
|   | 129 | 2-hydroxy-3-methylacyl-CoA; (Acyl-CoA); [M+H] <sup>+</sup> ;  | -11.33 | 854.1592 | CCC(O)C(=O)SCCNC(=O)CCNC(=O)[C@H](O)C(C)(C)COP(O)(=O)OP(O)(=O)OC[C@H]1O[C@H]([C@H](O)[C@@H]1OP(O)(O)=O)n1cnc2c(N)ncnc12     | 2-Hydroxybutanoyl-CoA | 2  | 2  | 0 | 0 | 2-Hydroxybutanoyl-CoA - wrong name in library             |
|   | 130 | 4-Hydroxybutyryl-CoA; (Acyl-CoA); [M+H] <sup>+</sup> ;        | -11.89 | 854.1592 | CC(C)(COP(O)(=O)OP(O)(=O)OCC1OC(C(O)C1OP(O)(O)=O)n1cnc2c(N)ncnc12)C(O)C(=O)NCCC(=O)NCCSC(=O)CCO                             | 4-Hydroxybutyryl-CoA  | 6  | 7  | 0 | 0 |                                                           |
|   | 131 | CID4469810; (Acyl-CoA); [M+H] <sup>+</sup> ;                  | -13.60 | 854.1592 | CC(C)(COP(O)(=O)OP(O)(=O)OCC1OC(C(O)C1OP(O)(O)=O)n1cnc2c(N)ncnc12)C(O)C(=O)NCCC(=O)NCCSCCCC(O)=O                            | -                     | 2  | 2  | 0 | 0 | 3-Carboxypropyl-coenzyme A with different stereochemistry |
|   | 132 | 3-CARBOXYPROPYL-COENZYME A; (Acyl-CoA); [M+H] <sup>+</sup> ;  | -13.60 | 854.1592 | CC(C)(COP(O)(=O)OP(O)(=O)OC[C@H]1O[C@H]([C@H](O)[C@@H]1OP(O)(O)=O)n1cnc2c(N)ncnc12)[C@@H](O)C(=O)NCCC(=O)NCCSCCCC(O)=O      | 3-Carboxypropyl-CoA   | 2  | 2  | 0 | 0 |                                                           |
|   | 133 | CID445337; (Acyl-CoA); [M+H] <sup>+</sup> ;                   | -13.32 | 854.1592 | C[C@H](CSCCNC(=O)CCNC(=O)[C@H](O)C(C)(C)COP(O)(=O)OP(O)(=O)OC[C@H]1O[C@H]([C@H](O)[C@@H]1OP(O)(O)=O)n1cnc2c(N)ncnc12)C(O)=O | 2-Carboxypropyl-CoA   | 4  | 4  | 0 | 0 |                                                           |
|   | 134 | 3-Hydroxybutyryl-coenzyme A; (Acyl-CoA); [M+H] <sup>+</sup> ; | -11.77 | 854.1592 | C[C@@H](O)CC(=O)SCCNC(=O)CCNC(=O)C(O)C(C)(C)COP(O)(=O)OP(O)(=O)OC[C@H]1O[C@H]([C@H](O)[C@@H]1OP(O)(O)=O)n1cnc2c(N)ncnc12    | 3-Hydroxybutanoyl-CoA | 13 | 13 | 0 | 0 |                                                           |
|   | 135 | 2-carboxypropyl-coenzyme a; (Acyl-CoA); [M+H] <sup>+</sup> ;  | -13.32 | 854.1592 | CC(CSCCNC(=O)CCNC(=O)C(O)C(C)(C)COP(O)(=O)OP(O)(=O)OCC1OC(C(O)C1OP(O)(O)=O)n1cnc2c(N)ncnc12)C(O)=O                          | 2-carboxypropyl-CoA   | 4  | 5  | 0 | 0 |                                                           |

|   |          |                                                                 |        |          |                                                                                                                             |                                      |    |    |     |     |                                                                      |
|---|----------|-----------------------------------------------------------------|--------|----------|-----------------------------------------------------------------------------------------------------------------------------|--------------------------------------|----|----|-----|-----|----------------------------------------------------------------------|
| 7 | 160      | PubChem<br>CID:<br>25245510;<br>(Acyl-<br>CoA);<br>[M+H]+;      | -9.47  | 866.1956 | CCCC(C(=O)SCCNC(=O)CCNC(=O)C(O)C(C)(C)COP(O)(=O)OP(O)(=O)OCC1OC([C@H](O)[C@@H]1OP(O)(O)=O)n1cnc2c(N)ncnc12                  | 2-<br>Methylvaleryl-<br>CoA          | 3  | 3  | 0   | 0   |                                                                      |
|   | 161      | MRR;<br>(Acyl-<br>CoA);<br>[M+H]+;                              | -9.47  | 866.1956 | CCC[C@H](C(=O)SCCNC(=O)CCNC(=O)[C@H](O)C(C)(C)COP(O)(=O)OP(O)(=O)OC[C@H]1O[C@H]([C@H](O)[C@@H]1OP(O)(O)=O)n1cnc2c(N)ncnc12  | -                                    | 3  | 3  | 0   | 0   | 2-<br>Methylv<br>aleryl-<br>CoA<br>(stereoc<br>hemistry<br>different |
|   | 162      | CID53264<br>63; (Acyl-<br>CoA);<br>[M+H]+;                      | -11.44 | 866.1956 | CCC\C=C\O.CC(C)(COP(O)(=O)OP(O)(=O)OC[C@H]1O[C@H]([C@H](O)[C@@H]1OP(O)(O)=O)n1cnc2c(N)ncnc12)[C@H](O)C(=O)NCCC(=O)NCCS      | -                                    |    |    |     |     | Structure<br>includes<br>salt                                        |
|   | 163      | hexanoyl-<br>coenzyme<br>a; (Acyl-<br>CoA);<br>[M+H]+;          | -9.57  | 866.1956 | CCCCC(=O)SCCNC(=O)CCNC(=O)[C@H](O)C(C)(C)COP(O)(=O)OP(O)(=O)OC[C@H]1O[C@H]([C@H](O)[C@@H]1OP(O)(O)=O)n1cnc2c(N)ncnc12       | hexanoyl-CoA                         | 14 | 28 | 5   | 1   |                                                                      |
|   | 168<br>7 | 4-Methyl<br>Valeric<br>Acid-CoA;<br>(Acyl-<br>CoA);<br>[M+H]+;  | -9.73  | 866.1956 | [#6]C([#6])CCC(=O)SCCNC(=O)CCNC(=O)C(O)C([#6])([#6])COP(O)(=O)OP(O)(=O)OCC1OC(C(O)C1OP(O)(O)=O)N1C=NC2=C1N=CN=C2[#7]        | 4-<br>Methylpentano<br>yl-CoA        | 2  | 2  | 0   | 0   |                                                                      |
| 8 | 164      | SCA; (Acyl-<br>CoA);<br>[M+H]+;                                 | -14.37 | 868.1385 | CC(C)(COP(O)(=O)OP(O)(=O)OC[C@H]1O[C@H]([C@H](O)[C@@H]1OP(O)(O)=O)n1cnc2c(N)ncnc12)[C@H](O)C(=O)NCCC(=O)NCCSC(O)\C=C\C(O)=O | 4-hydroxy-2-<br>butenoic acid<br>CoA | 1  | 1  | 0   | 0   |                                                                      |
|   | 165      | CID10748<br>187; (Acyl-<br>CoA);<br>[M+H]+;                     | -14.70 | 868.1385 | CC(C)(COP(O)(=O)OP(O)(=O)OC[C@H]1O[C@H]([C@H](O)[C@@H]1OP(O)(O)=O)n1cnc2c(N)ncnc12)[C@H](O)C(=O)NCCC(=O)NCCCC(=O)SCC(O)=O   | -                                    |    |    |     |     | Not a<br>CoA                                                         |
|   | 166      | succinyl-<br>CoA;<br>(Acyl-<br>CoA);<br>[M+H]+;                 | -14.58 | 868.1385 | CC(C)(COP(O)(=O)OP(O)(=O)OC[C@H]1O[C@H]([C@H](O)[C@@H]1OP(O)(O)=O)n1cnc2c(N)ncnc12)[C@H](O)C(=O)NCCC(=O)NCCSC(=O)CCC(O)=O   | Succinyl-CoA                         | 18 | 26 | 747 | 98  |                                                                      |
|   | 167      | Methylmal<br>onyl CoA;<br>(Acyl-<br>CoA);<br>[M+H]+;            | -14.01 | 868.1385 | CC(C(O)=O)C(=O)SCCNC(=O)CCNC(=O)C(O)C(C)(C)COP(O)(=O)OP(O)(=O)OCC1OC(C(O)C1OP(O)(O)=O)n1cnc2c(N)ncnc12                      | Methylmalonyl-<br>CoA                | 18 | 32 | 749 | 171 |                                                                      |
| 9 | 224      | 2-<br>Methylhex<br>anoyl-<br>CoA;<br>(Acyl-<br>CoA);<br>[M+H]+; | -9.03  | 880.2113 | CCCC(C(=O)SCCNC(=O)CCNC(=O)[C@H](O)C(C)(C)COP(O)(=O)OP(O)(=O)OC[C@H]1O[C@H]([C@H](O)[C@@H]1OP(O)(O)=O)n1cnc2c(N)ncnc12      | 2-<br>Methylhexanoy<br>l-CoA         | 5  | 5  | 0   | 0   |                                                                      |

|    |          |                                                                      |        |          |                                                                                                                                |                              |    |    |    |   |  |
|----|----------|----------------------------------------------------------------------|--------|----------|--------------------------------------------------------------------------------------------------------------------------------|------------------------------|----|----|----|---|--|
|    | 188<br>7 | C7:0-CoA;<br>(Acyl-CoA);<br>[M+H] <sup>+</sup> ;                     | -9.12  | 880.2113 | CCCCC(=O)SCCNC(=O)CCNC(=O)C(O)C(C)(C)COP(O)(=O)OP(O)(=O)OCC1OC(C(O)C1OP(O)(O)=O)n1cnc2c(N)ncnc12                               | heptanoyl-CoA                | 5  | 5  | 0  | 0 |  |
| 10 | 229      | 2,4,4-Trimethylpentanoyl-CoA;<br>(Acyl-CoA);<br>[M+H] <sup>+</sup> ; | -8.88  | 894.2269 | CC(C(C)(C)C)C(=O)SCCNC(=O)CCNC(=O)[C@H](O)C(C)(C)COP(O)(=O)OP(O)(=O)OC[C@H]1O[C@H]([C@H](O)[C@@H]1)OP(O)(O)=O)n1cnc2c(N)ncnc12 | 2,4,4-Trimethylpentanoyl-CoA | 1  | 1  | 0  | 0 |  |
|    | 230      | Valproyl-CoA;<br>(Acyl-CoA);<br>[M+H] <sup>+</sup> ;                 | -8.58  | 894.2269 | CCCC(CCC)C(=O)SCCNC(=O)CCNC(=O)C(O)C(C)(C)COP(O)(=O)OP(O)(=O)OC[C@H]1O[C@H]([C@H](O)[C@@H]1)OP(O)(O)=O)n1cnc2c(N)ncnc12        | Valproyl-CoA                 | 8  | 11 | 0  | 0 |  |
|    | 231      | octanoyl-CoA;<br>(Acyl-CoA);<br>[M+H] <sup>+</sup> ;                 | -8.68  | 894.2269 | CCCCCCCC(=O)SCCNC(=O)CCNC(=O)[C@@H](O)C(C)(C)COP(O)(=O)OP(O)(=O)OC[C@H]1O[C@H](C(O)[C@H]1)OP(O)(O)=O)n1cnc2c(N)ncnc12          | Octanoyl-CoA                 | 26 | 45 | 16 | 1 |  |
| 11 | 310      | PubChem CID: 25202290;<br>(Acyl-CoA);<br>[M+H] <sup>+</sup> ;        | -9.32  | 900.1800 | CC(C)(COP(O)(=O)OP(O)(=O)OCC1OC(C(O)C1OP(O)(O)=O)n1cnc2c(N)ncnc12)C(O)C(=O)NCCC(=O)NCCSC(=O)CC1CCCC1                           | 3-phenylpropanoyl-CoA        | 6  | 6  | 0  | 0 |  |
|    | 311      | 4-Tolylacetyl-CoA;<br>(Acyl-CoA);<br>[M+H] <sup>+</sup> ;            | -9.25  | 900.1800 | Cc1ccc(CC(=O)SCCNC(=O)CCNC(=O)[C@H](O)C(C)(C)COP(O)(=O)OP(O)(=O)OC[C@H]2O[C@H]([C@H](O)[C@@H]2)OP(O)(O)=O)n2cnc3c(N)ncnc23)cc1 | 4-Tolylacetyl-CoA            | 4  | 4  | 0  | 0 |  |
|    | 312      | 3-Tolylacetyl-CoA;<br>(Acyl-CoA);<br>[M+H] <sup>+</sup> ;            | -9.25  | 900.1800 | Cc1cccc(CC(=O)SCCNC(=O)CCNC(=O)[C@H](O)C(C)(C)COP(O)(=O)OP(O)(=O)OC[C@H]2O[C@H]([C@H](O)[C@@H]2)OP(O)(O)=O)n2cnc3c(N)ncnc23)c1 | 3-Tolylacetyl-CoA            | 4  | 4  | 0  | 0 |  |
|    | 313      | Phenylpropionyl-CoA;<br>(Acyl-CoA);<br>[M+H] <sup>+</sup> ;          | -9.32  | 900.1800 | CC(C)(COP(O)(=O)OP(O)(=O)OC[C@H]1O[C@H]([C@H](O)[C@@H]1)OP(O)(O)=O)n1cnc2c(N)ncnc12)[C@@H](O)C(=O)NCCC(=O)NCCSC(=O)CCc1cccc1   | 3-phenylpropanoyl-CoA        | 6  | 6  | 0  | 0 |  |
|    | 314      | 2-Tolylacetyl-CoA;<br>(Acyl-CoA);<br>[M+H] <sup>+</sup> ;            | -9.25  | 900.1800 | Cc1cccc1CC(=O)SCCNC(=O)CCNC(=O)[C@H](O)C(C)(C)COP(O)(=O)OP(O)(=O)OC[C@H]1O[C@H]([C@H](O)[C@@H]1)OP(O)(O)=O)n1cnc2c(N)ncnc12    | 2-Tolylacetyl-CoA            | 4  | 4  | 0  | 0 |  |
|    | 307      | CID4961354; (Acyl-                                                   | -13.72 | 900.1647 | CC(C(O)C(O)=O)C(=O)SCCNC(O)CCNC(=O)C(O)C(C)(C)COP(O)(=O)OP(O)(=O)OCC1OC(C(O)C1OP(O)(O)=O)n1cnc2c(N)ncnc12                      | 2-hydroxy-3-methyl-4-        | 2  | 2  | 0  | 0 |  |

|    |     |                                                                        |       |          |                                                                                                                                    |  |                           |   |    |   |   |  |  |                                       |
|----|-----|------------------------------------------------------------------------|-------|----------|------------------------------------------------------------------------------------------------------------------------------------|--|---------------------------|---|----|---|---|--|--|---------------------------------------|
|    |     | CoA);<br>[M+H] <sup>+</sup> ;                                          |       |          |                                                                                                                                    |  | oxobutanoic acid-CoA      |   |    |   |   |  |  |                                       |
| 12 | 376 | Perillyl-CoA;<br>(Acyl-CoA);<br>[M+H] <sup>+</sup> ;                   | -8.73 | 916.2113 | CC(=C)C1CCC(=CC1)C(=O)SCCNC(=O)CCNC(=O)[C@H](O)C(C)(C)COP(O)(=O)OP(O)(=O)OC[C@H]1O[C@H]([C@H](O)[C@@H]1OP(O)(O)=O)n1cnc2c(N)ncnc12 |  | Perillyl-CoA              | 6 | 6  | 0 | 0 |  |  |                                       |
|    | 377 | Perillyl-CoA;<br>(Acyl-CoA);<br>[M+H] <sup>+</sup> ;                   | -8.73 | 916.2113 | CC(=C)C1CCC(=CC1)C(=O)SCCNC(=O)CCNC(=O)C(O)C(C)(C)COP(O)(=O)OP(O)(=O)OC[C@H]1O[C@H]([C@H](O)[C@@H]1OP(O)(O)=O)n1cnc2c(N)ncnc12     |  | -                         | 6 | 6  | 0 | 0 |  |  | Also Perillyl-CoA no stereoch emistry |
| 13 | 562 | trans-tetradec-2-enoyl-coenzyme A; (Acyl-CoA);<br>[M+H] <sup>+</sup> ; | -5.78 | 976.3052 | CCCCCCCCC\C=C\C(=O)SCCNC(=O)CCNC(=O)[C@H](O)C(C)(C)COP(O)(=O)OP(O)(=O)OC[C@H]1O[C@H]([C@H](O)[C@@H]1OP(O)(O)=O)n1cnc2c(N)ncnc12    |  | (2E)-Tetradecenoyl-CoA    | 8 | 10 | 0 | 0 |  |  |                                       |
|    | 563 | 3-Tetradecenoyl-S-coenzyme A; (Acyl-CoA);<br>[M+H] <sup>+</sup> ;      | -6.37 | 976.3052 | CCCCCCCCC\C=C\C(=O)SCCNC(=O)CCNC(=O)C(O)C(C)(C)COP(O)(=O)OP(O)(=O)OCC1OC(C(O)C1OP(O)(O)=O)n1cnc2c(N)ncnc12                         |  | 3-Tetradecenoyl-S-CoA     | 3 | 3  | 0 | 0 |  |  |                                       |
|    | 564 | 3-Tetradecenoyl-S-coenzyme A; (Acyl-CoA);<br>[M+H] <sup>+</sup> ;      | -6.37 | 976.3052 | CCCCCCCCC\C=C\C(=O)SCCNC(=O)CCNC(=O)[C@@H](O)C(C)(C)COP(O)(=O)OP(O)(=O)OCC1OC(C(O)C1OP(O)(O)=O)n1cnc2c(N)ncnc12                    |  | 3-Tetradecenoyl-S-CoA     | 3 | 3  | 0 | 0 |  |  |                                       |
|    | 565 | (11Z)-Tetradecenoyl-CoA; (Acyl-CoA);<br>[M+H] <sup>+</sup> ;           | -6.37 | 976.3052 | CC\C=C/CCCCCCCC(=O)SCCNC(=O)CCNC(=O)C(O)C(C)(C)COP(O)(=O)OP(O)(=O)OC[C@H]1O[C@H]([C@H](O)[C@@H]1OP(O)(O)=O)n1cnc2c(N)ncnc12        |  | cis-tetradec-11-enoyl-CoA | 5 | 5  | 0 | 0 |  |  |                                       |
|    | 566 | (2E)-Tetradecenoyl-CoA; (Acyl-CoA);<br>[M+H] <sup>+</sup> ;            | -5.78 | 976.3052 | CCCCCCCCC\C=C\C(=O)SCCNC(=O)CCNC(=O)C(O)C(C)(C)COP(O)(=O)OP(O)(=O)OC[C@H]1O[C@H]([C@H](O)[C@@H]1OP(O)(O)=O)n1cnc2c(N)ncnc12        |  | (2E)-Tetradecenoyl-CoA    | 8 | 10 | 0 | 0 |  |  | Duplicate                             |
|    | 567 | Tetradecenoyl-CoA; (Acyl-CoA);<br>[M+H] <sup>+</sup> ;                 | -5.78 | 976.3052 | CCCCCCCCC=CC(=O)SCCNC(=O)CCNC(=O)C(O)C(C)(C)COP(O)(=O)OP(O)(=O)OCC1OC(C(O)C1OP(O)(O)=O)n1cnc2c(N)ncnc12                            |  | Tetradecenoyl-CoA         |   |    |   |   |  |  | No stereoch emistry                   |
|    | 568 | CID494378; (Acyl-CoA);                                                 | -6.37 | 976.3052 | CCCCCCCCC=CCC(=O)SCCNC(=O)CCNC(=O)C(O)C(C)(C)COP(O)(=O)OP(O)(=O)OCC1OC(C(O)C1OP(O)(O)=O)n1cnc2c(N)ncnc12                           |  | 3-Tetradecenoyl-S-CoA     | 3 | 3  | 0 | 0 |  |  | Duplicate                             |



|    |      |                                                                         |       |           |                                                                                                                                               |                              |     |      |     |   |                    |  |  |  |
|----|------|-------------------------------------------------------------------------|-------|-----------|-----------------------------------------------------------------------------------------------------------------------------------------------|------------------------------|-----|------|-----|---|--------------------|--|--|--|
|    |      | [M+H]+;                                                                 |       |           |                                                                                                                                               |                              |     |      |     |   |                    |  |  |  |
|    | 569  | CID358835; (Acyl-CoA); [M+H]+;                                          | -6.37 | 976.3052  | CCCCCCCCCCC(=O)SCCNC(=O)CCNC(=O)[C@@H](O)C(C)(C)COP(O)(=O)OP(O)(=O)OCC1OC(C)O)C1OP(O)(O)=O)n1cnc2c(N)ncnc12                                   | 3-Tetradecenoyl-S-CoA        | 3   | 3    | 0   | 0 | Duplicate          |  |  |  |
| 14 | 572  | Tetradecanoyl-CoA (myristoyl); (Acyl-CoA); [M+H]+;                      | -6.01 | 978.3209  | CCCCCCCCCCC(=O)SCCNC(=O)CCNC(=O)[C@@H](O)C(C)(C)COP(O)(=O)OP(O)(=O)OC[C@H]1O[C@H](C(O)[C@H]1OP(O)(O)=O)n1cnc2c(N)ncnc12                       | Myristoyl-CoA                | 14  | 61   | 213 | 5 |                    |  |  |  |
|    | 573  | CID446292; (Acyl-CoA); [M+H]+;                                          | -6.41 | 978.3209  | CCCCCCCCCCC(=O)CSCCNC(=O)CCNC(=O)[C@@H](O)C(C)(C)COP(O)(=O)OP(O)(=O)OC[C@H]1O[C@H]([C@H]1O)[C@@H]1OP(O)(O)=O)n1cnc2c(N)ncnc12                 | -                            | 2   | 2    | 0   | 0 | Not an acyl CoA    |  |  |  |
| 15 | 633  | cis-9-Hexadecenoyl Coenzyme-A; (Acyl-CoA); [M+H]+;                      | -5.48 | 1004.3360 | CCCCC\C=C/CCCCCCC(=O)SCCNC(=O)CCNC(=O)[C@@H](O)C(C)(C)COP(O)(=O)OP(O)(=O)OC[C@H]1O[C@H]([C@H]1O)[C@@H]1OP(O)(O)=O)n1cnc2c(N)ncnc12            | palmitoleoyl-CoA             | 6   | 7    | 0   | 0 |                    |  |  |  |
|    | 634  | (2E)-Hexadecenoyl-CoA; (Acyl-CoA); [M+H]+;                              | -4.89 | 1004.3360 | CCCCCCCCCCC\C=C\C(=O)SCCNC(=O)CCNC(=O)[C@@H](O)C(C)(C)COP(O)(=O)OP(O)(=O)OC[C@H]1O[C@H](C(O)[C@@H]1OP(O)(O)=O)n1cnc2c(N)ncnc12                | hexadec-2-enoyl-CoA          | 4   | 5    | 0   | 0 |                    |  |  |  |
| 16 | 580  | palmitoyl                                                               | -5.12 | 1006.3526 | CCCCCCCCCCCCCCC(=O)SCCNC(=O)CCNC(=O)[C@@H](O)C(C)(C)COP(O)(=O)OP(O)(=O)OC[C@H]1O[C@H]([C@H]1O)[C@@H]1OP(O)(O)=O)n1cnc2c(N)ncnc12              | Palmitoyl-CoA                | 124 | 1572 | 19  |   |                    |  |  |  |
|    | 581  | 4,8,12 trimethyldecanoyl                                                | -5.60 | 1006.3526 | CC(C)CCCC(C)CCCC(C)CCC(=O)SCCNC(=O)CCNC(=O)C(O)C(C)(C)COP(O)(=O)OP(O)(=O)OC[C@H]1O[C@H]([C@H]1O)[C@@H]1OP(O)(O)=O)n1cnc2c(N)ncnc12            | 4,8,12 trimethyldecanoyl-CoA | 5   | 5    | 0   | 0 |                    |  |  |  |
| 17 | 1782 | 11-TRANS-13-TRANS-15-CIS-OCTADECATRIENOIC ACID-CoA; (Acyl-CoA); [M+H]+; | -5.32 | 1028.3360 | [#6]C\C=C/C=C/C=C/C/CCCCCCCC(=O)SCCNC(=O)CCNC(=O)C(O)C([#6])([#6])COP(O)(=O)OP(O)(=O)OCC1OC(C)O)C1OP(O)(O)=O)N1C=NC2=C1N=CN=C2[#7]            | -                            |     |      |     |   | not in Chempisider |  |  |  |
|    | 617  | alpha-Linolenoyl-CoA; (Acyl-CoA); [M+H]+;                               | -5.32 | 1028.3370 | CC\C=C/C\C=C/C\C=C/C/CCCCCCC(=O)SCCNC(=O)CCNC(=O)C(O)C(C)(C)COP(O)(=O)OP(O)(=O)OC[C@H]1O[C@H]([C@H]1O)[C@@H]1OP(O)(O)=O)n1cnc2c(N)ncnc12      | alpha-Linolenoyl-CoA         | 5   | 5    | 0   | 0 |                    |  |  |  |
|    | 618  | CHEBI:15508; (Acyl-CoA);                                                | -5.32 | 1028.3370 | CCCCC\C=C/C\C=C/C\C=C/C/CCCC(=O)SCCNC(=O)CCNC(=O)[C@@H](O)C(C)(C)COP(O)(=O)OP(O)(=O)OC[C@H]1O[C@H]([C@H]1O)[C@@H]1OP(O)(O)=O)n1cnc2c(N)ncnc12 | gamma-Linolenoyl-CoA         | 10  | 13   | 0   | 0 |                    |  |  |  |

|    |          |                                                                                                      |       |           |                                                                                                                                             |                                                  |    |    |   |   |  |  |  |  |                                   |
|----|----------|------------------------------------------------------------------------------------------------------|-------|-----------|---------------------------------------------------------------------------------------------------------------------------------------------|--------------------------------------------------|----|----|---|---|--|--|--|--|-----------------------------------|
|    |          | [M+H] <sup>+</sup> ;                                                                                 |       |           |                                                                                                                                             |                                                  |    |    |   |   |  |  |  |  |                                   |
|    | 619      | PubChem<br>CID:<br>5388873;<br>(Acyl-<br>CoA);<br>[M+H] <sup>+</sup> ;                               | -5.32 | 1028.3370 | CCCCC\C=C\C=C\C=C\C=C\CCCC(=O)SCCNC(=O)CCNC(=O)C(O)C(C)(C)COP(O)(=O)OP(O)(=O)OCC1OC(C(O)C1O<br>P(O)(O)=O)n1cnc2c(N)ncnc12                   | (6E,9E,12E)-<br>octadecatrienoic<br>acid-CoA     | 3  | 3  | 0 | 0 |  |  |  |  |                                   |
|    | 620      | gamma-<br>Linolenoyl<br>-CoA;<br>(Acyl-<br>CoA);<br>[M+H] <sup>+</sup> ;                             | -5.32 | 1028.3370 | CCCCC\C=C/C\C=C/C\C=C/C\CCCC(=O)SCCNC(=O)CCNC(=O)C(O)C(C)(C)COP(O)(=O)OP(O)(=O)OC[C@H]1O[C@H]<br>][C@H](O)[C@H]1OP(O)(O)=O)n1cnc2c(N)ncnc12 | gamma-<br>Linolenoyl-CoA                         | 10 | 13 | 0 | 0 |  |  |  |  | Different<br>stereochemis-<br>try |
|    | 621      | CID65646<br>9; (Acyl-<br>CoA);<br>[M+H] <sup>+</sup> ;                                               | -5.32 | 1028.3370 | CCCCC=CCC=CCC=CCCCC(=O)SCCNC(=O)CCNC(=O)C(O)C(C)(C)COP(O)(=O)OP(O)(=O)OCC1OC(C(O)C1OP(O)(<br>O)=O)n1cnc2c(N)ncnc12                          | gamma-<br>Linolenoyl-CoA                         | 10 | 13 | 0 | 0 |  |  |  |  | Different<br>stereochemis-<br>try |
| 18 | 682      | CHEBI:531<br>51; (Acyl-<br>CoA);<br>[M+H] <sup>+</sup> ;                                             | -4.65 | 1030.3520 | CCCCCCCC#CCCCCCCC(=O)SCCNC(=O)CCNC(=O)[C@H](O)C(C)(C)COP(O)(=O)OP(O)(=O)OC[C@H]1O[C@H]([<br>C@H](O)[C@H]1OP(O)(O)=O)n1cnc2c(N)ncnc12        | 9-<br>Octadecynoyl-<br>CoA                       | 2  | 2  | 0 | 0 |  |  |  |  |                                   |
|    | 683      | (6Z,9Z)-<br>Octadeca-<br>dienoyl-<br>CoA;<br>(Acyl-<br>CoA);<br>[M+H] <sup>+</sup> ;                 | -4.96 | 1030.3520 | CCCCCCC\C=C/C\C=C/C\CCCC(=O)SCCNC(=O)CCNC(=O)[C@H](O)C(C)(C)COP(O)(=O)OP(O)(=O)OC[C@H]1O[C@<br>H](C(O)[C@H]1OP(O)(O)=O)n1cnc2c(N)ncnc12     | (6Z,9Z)-<br>Octadecadieno-<br>yl-CoA             | 2  | 2  | 0 | 0 |  |  |  |  |                                   |
|    | 684      | Linoleyl-<br>CoA;<br>(Acyl-<br>CoA);<br>[M+H] <sup>+</sup> ;                                         | -4.96 | 1030.3520 | CCCCC\C=C/C\C=C/C\CCCCC(=O)SCCNC(=O)CCNC(=O)[C@H](O)C(C)(C)COP(O)(=O)OP(O)(=O)OC[C@H]1O[<br>C@H]([C@H](O)[C@H]1OP(O)(O)=O)n1cnc2c(N)ncnc12  | Linoleyl-CoA                                     | 11 | 12 | 0 | 0 |  |  |  |  |                                   |
|    | 184<br>6 | (10E,12Z)-<br>octadeca-<br>10,12-<br>dienoic<br>acid-CoA;<br>(Acyl-<br>CoA);<br>[M+H] <sup>+</sup> ; | -4.96 | 1030.3520 | [#6]CCCC\C=C/C=C/C\CCCCCCCC(=O)SCCNC(=O)CCNC(=O)C(O)C([#6])([#6])COP(O)(=O)OP(O)(=O)OCC1OC(C(O)<br>C1OP(O)(O)=O)N1C=NC2=C1N=CN=C2[#7]       | (10E,12Z)-<br>octadeca-<br>10,12-dienoyl-<br>CoA |    |    |   |   |  |  |  |  | Not in<br>chemspider              |
| 19 | 687      | (2E)-<br>Octadecen-<br>oyl-CoA;<br>(Acyl-<br>CoA);<br>[M+H] <sup>+</sup> ;                           | -4.00 | 1032.3680 | CCCCCCCCCCCCC\C=C\C(=O)SCCNC(=O)CCNC(=O)C(O)C(C)(C)COP(O)(=O)OP(O)(=O)OC[C@H]1O[C@H]([C@<br>H](O)[C@H]1OP(O)(O)=O)n1cnc2c(N)ncnc12          | trans-2-<br>octadecenoyl-<br>CoA                 | 6  | 7  | 0 | 0 |  |  |  |  |                                   |
|    | 688      | Vaccenoyl<br>-CoA;<br>(Acyl-<br>CoA);<br>[M+H] <sup>+</sup> ;                                        | -4.60 | 1032.3680 | CCCCC\C=C\CCCCCCCCC(=O)SCCNC(=O)CCNC(=O)C(O)C(C)(C)COP(O)(=O)OP(O)(=O)OCC1OC(C(O)C1OP(O)(O<br>)=O)n1cnc2c(N)ncnc12                          | trans-<br>vaccenoyl-CoA                          | 2  | 2  | 0 | 0 |  |  |  |  |                                   |

|    |     |                                                                        |        |           |                                                                                                                                                       |                                       |    |    |   |   |                                      |
|----|-----|------------------------------------------------------------------------|--------|-----------|-------------------------------------------------------------------------------------------------------------------------------------------------------|---------------------------------------|----|----|---|---|--------------------------------------|
|    | 689 | Oleoyl-coenzyme A; (Acyl-CoA); [M+H] <sup>+</sup> ;                    | -4.60  | 1032.3680 | CCCCCCCC=CCCCCCCC(=O)SCCNC(=O)CCNC(=O)C(O)C(C)COP(O)(=O)OP(O)(=O)OCC1OC(C(O)C1OP(O)(O)=O)n1cnc2c(N)ncnc12                                             | Oleoyl-CoA                            | 24 | 26 | 0 | 0 |                                      |
| 20 | 734 | (8Z,11Z,14Z,17Z)-Icosatetraenoyl-CoA; (Acyl-CoA); [M+H] <sup>+</sup> ; | -4.79  | 1054.3520 | CC\C=C/C\C=C/C\C=C/C\C=C/CCCCC(=O)SCCNC(=O)CCNC(=O)C(O)C(C)COP(O)(=O)OP(O)(=O)OC[C@H]1O[C@H]([C@H](O)[C@@H]1OP(O)(O)=O)n1cnc2c(N)ncnc12               | (8Z,11Z,14Z,17Z)-eicosatetraenoyl-CoA | 3  | 3  | 0 | 0 |                                      |
|    | 735 | Arachidonoyl-CoA; (Acyl-CoA); [M+H] <sup>+</sup> ;                     | -4.79  | 1054.3520 | CCCC\C=C/C\C=C/C\C=C/C\C=C/CCCC(=O)SCCNC(=O)CCNC(=O)[C@H](O)C(C)COP(O)(=O)OP(O)(=O)OC[C@H]1O[C@H](C(O)[C@H]1OP(O)(O)=O)n1cnc2c(N)ncnc12               | Arachidonoyl-CoA                      | 9  | 9  | 0 | 0 |                                      |
| 21 | 736 | (11Z,14Z,17Z)-Icosatrienoyl-CoA; (Acyl-CoA); [M+H] <sup>+</sup> ;      | -4.43  | 1056.3680 | CC\C=C/C\C=C/C\C=C/CCCCCCCC(=O)SCCNC(=O)CCNC(=O)C(O)C(C)COP(O)(=O)OP(O)(=O)OC[C@H]1O[C@H]([C@H](O)[C@@H]1OP(O)(O)=O)n1cnc2c(N)ncnc12                  | (11Z,14Z,17Z)-eicosatrienoyl-CoA      | 3  | 3  | 0 | 0 |                                      |
|    | 737 | 8,11,14-Eicosatrienoyl-CoA; (Acyl-CoA); [M+H] <sup>+</sup> ;           | -4.43  | 1056.3680 | CCCCC\C=C/C\C=C/C\C=C/CCCCC(=O)SCCNC(=O)CCNC(=O)[C@H](O)C(C)COP(O)(=O)OP(O)(=O)OC[C@H]1O[C@H]([C@H](O)[C@@H]1OP(O)(O)=O)n1cnc2c(N)ncnc12              | (8Z,11Z,14Z)-Icosatrienoyl-CoA        | 7  | 9  | 0 | 0 |                                      |
|    | 738 | 8,11,14-Eicosatrienoyl-CoA; (Acyl-CoA); [M+H] <sup>+</sup> ;           | -4.43  | 1056.3680 | CCCCC\C=C/C\C=C/C\C=C/CCCCC(=O)SCCNC(=O)CCNC(=O)C(O)C(C)COP(O)(=O)OP(O)(=O)OC[C@H]1O[C@H]([C@H](O)[C@@H]1OP(O)(O)=O)n1cnc2c(N)ncnc12                  | (8Z,11Z,14Z)-Icosatrienoyl-CoA        | 7  | 9  | 0 | 0 | Different stereochemistry on the CoA |
|    | 739 | 8,11,14-Eicosatrienoyl-CoA; (Acyl-CoA); [M+H] <sup>+</sup> ;           | -4.43  | 1056.3680 | CCCCC=CCC=CCC=CCCCCCCC(=O)SCCNC(=O)CCNC(=O)C(O)C(C)COP(O)(=O)OP(O)(=O)OCC1OC(C(O)C1OP(O)(O)=O)n1cnc2c(N)ncnc12                                        | (8Z,11Z,14Z)-Icosatrienoyl-CoA        | 7  | 9  | 0 | 0 | Different stereochemistry on the CoA |
| 22 | 757 | CoA-glutathione; (Acyl-CoA); [M+H] <sup>+</sup> ;                      | -19.58 | 1073.1910 | CC(C)COP(O)(=O)OP(O)(=O)OC[C@H]1OC([C@H](O)[C@@H]1OP(O)(O)=O)n1cnc2c(N)ncnc12)C(O)C(=O)NCCC(=O)NCCSSCC(NC(=O)CCC(N)C(O)=O)C(=O)NCCC(O)=O              | Glutathione-CoA                       | 3  | 3  | 0 | 0 |                                      |
|    | 758 | Coassg; (Acyl-CoA); [M+H] <sup>+</sup> ;                               | -19.12 | 1073.1910 | CC(C)(CO)COP(O)(=O)OP(O)(=O)OC[C@H]1O[C@H]([C@H](O)[C@@H]1OP(O)(O)=O)n1cnc2c(N)ncnc12)C(=O)NCCC(=O)NCCSSC[C@H](N)C(=O)N(CC(O)=O)C(=O)CC[C@H](N)C(O)=O | -                                     | 2  | 2  | 0 | 0 | Not a CoA                            |



**Table S3: The original spectra from which the rules were formulated for CoA-Blast library generation**

| Name                      | InChiKey                     | Ion mode           | Precursor m/z | Exact mass | Instrument                                     | Analyzer type | Collision energy [V] | Number of peaks | Source DOI or URL                                                                                                                                                       |
|---------------------------|------------------------------|--------------------|---------------|------------|------------------------------------------------|---------------|----------------------|-----------------|-------------------------------------------------------------------------------------------------------------------------------------------------------------------------|
| 3-methylcrotonyl-CoA      | BXIPALATIYNHJN-TVCSPYKZSA-N  | [M+H] <sup>+</sup> | 850.7         | 849.1571   | Agilent MSD Ion trap mass spectrometer SL, ESI | Ion Trap      | 1.00                 | 4               | <a href="http://dx.doi.org/10.1016/j.jchromb.2008.12.053">http://dx.doi.org/10.1016/j.jchromb.2008.12.053</a>                                                           |
| acetyl-CoA                | ZSLZBFCDICINBPY-ZSJPKINUSA-N | [M-H] <sup>-</sup> | 807.97        | 809.1258   | ABI 4800 TOF/TOF, MALDI                        | Q-TOF         | 7.00                 | 20              | DOI: 10.1021/ac070843+                                                                                                                                                  |
| Acetyl-CoA                | ZSLZBFCDICINBPY-ZSJPKINUSA-N | [M+H] <sup>+</sup> | 810.7         | 809.1258   | Agilent MSD Ion trap mass spectrometer SL, ESI | Ion Trap      | 1.00                 | 4               | <a href="http://dx.doi.org/10.1016/j.jchromb.2008.12.053">http://dx.doi.org/10.1016/j.jchromb.2008.12.053</a>                                                           |
| acetyl-CoA                | ZSLZBFCDICINBPY-ZSJPKINUSA-N | [M+H] <sup>+</sup> | 810.3         | 809.1258   | Waters Micromass Quattro micro MS, ESI         | Triple Quad   | 30.00                | 3               | DOI: 10.1002/jms.1240                                                                                                                                                   |
| acetyl-CoA                | ZSLZBFCDICINBPY-ZSJPKINUSA-N | [M+H] <sup>+</sup> | 810.1         | 809.1258   | ABI API 3000 triple quadrupole MS, ESI         | Triple Quad   | 52.00                | 6               | <a href="http://dx.doi.org/10.1016/j.jchromb.2007.03.029">http://dx.doi.org/10.1016/j.jchromb.2007.03.029</a>                                                           |
| acetyl-CoA                | ZSLZBFCDICINBPY-ZSJPKINUSA-N | [M+H] <sup>+</sup> | 810.13        | 809.1258   | LTQ Orbitrap XL, ESI                           | Orbitrap      | 35.00                | 37              | <a href="http://www.massbank.jp/RecordDisplay?id=KNA00606">http://www.massbank.jp/RecordDisplay?id=KNA00606</a>                                                         |
| C20:4-CoA (arachidonyl)   | JDEPVTUUCBFJIW-NKOIHYFNNSA-N | [M+H] <sup>-</sup> | 1052          | 1053.3449  | Thermo Finnigan TSQ 70, FAB                    | Triple Quad   | 30.00                | 11              | <a href="http://dx.doi.org/10.1016/1044-0305(94)85057-7">http://dx.doi.org/10.1016/1044-0305(94)85057-7</a>                                                             |
| beta-Hydroxybutyryl-CoA   | QHKKMYHDBRONY-RMNRSTNRSAN    | [M+H] <sup>+</sup> | 854.1         | 853.1520   | ABI API 3000 triple quadrupole MS, ESI         | Triple Quad   | 52.00                | 7               | <a href="http://dx.doi.org/10.1016/j.jchromb.2007.03.029">http://dx.doi.org/10.1016/j.jchromb.2007.03.029</a>                                                           |
| butyryl-CoA               | CRFNGMNYKDXRTN-CITAKDKDSA-N  | [M+H] <sup>+</sup> | 838.4         | 837.1571   | Waters Micromass Quattro micro MS, ESI         | Triple Quad   | 30.00                | 3               | DOI: 10.1002/jms.1241                                                                                                                                                   |
| C15:0-CoA                 | VLBCUOVMSMAIJC-UHFFFAOYSA-N  | [M+H] <sup>+</sup> | 992.4         | 991.3292   | ABI 4000 QTRAP, ESI                            | Ion Trap      | 50.00                | 6               | <a href="http://www.jlr.org/cgi/content/abstract/D800001-JLR200v1">http://www.jlr.org/cgi/content/abstract/D800001-JLR200v1</a>                                         |
| C16:0-CoA                 | MNBKLUUYKPBKDU-BBECNAHFSA-N  | [M+H] <sup>+</sup> | 1004.4        | 1005.3449  | ABI 4000 QTRAP, ESI                            | Ion Trap      | 60.00                | 9               | <a href="http://www.jlr.org/cgi/content/abstract/D800001-JLR200v1">http://www.jlr.org/cgi/content/abstract/D800001-JLR200v1</a>                                         |
| C16:0-CoA                 | MNBKLUUYKPBKDU-BBECNAHFSA-N  | [M+H] <sup>+</sup> | 1006.4        | 1005.3449  | ABI 4000 QTRAP, ESI                            | Ion Trap      | 50.00                | 7               | <a href="http://www.jlr.org/cgi/content/abstract/D800001-JLR200v1">http://www.jlr.org/cgi/content/abstract/D800001-JLR200v1</a>                                         |
| C17:0-CoA (heptadecyl)    | DRABUZIHHACUPI-DUPKZGIXSA-N  | [M+H] <sup>+</sup> | 1020          | 1019.3605  | Thermo LCQ ion trap, ESI                       | Ion Trap      | 24.00                | 4               | <a href="http://onlinelibrary.wiley.com/doi/10.1111/j.1365-313X.2001.00929.x/abstract">http://onlinelibrary.wiley.com/doi/10.1111/j.1365-313X.2001.00929.x/abstract</a> |
| C25:0-CoA                 | YJOJYMDYLIGHLQ-ADKOIVETNA-N  | [M-H] <sup>-</sup> | 1130.6        | 1131.4857  | ABI 4000 QTRAP, ESI                            | Ion Trap      | 59.00                | 10              | <a href="http://www.jlr.org/cgi/content/abstract/D800001-JLR200v1">http://www.jlr.org/cgi/content/abstract/D800001-JLR200v1</a>                                         |
| C25:0-CoA                 | YJOJYMDYLIGHLQ-ADKOIVETNA-N  | [M+H] <sup>+</sup> | 1132.6        | 1131.4857  | ABI 4000 QTRAP, ESI                            | Ion Trap      | 59.00                | 6               | <a href="http://www.jlr.org/cgi/content/abstract/D800001-JLR200v1">http://www.jlr.org/cgi/content/abstract/D800001-JLR200v1</a>                                         |
| Cholyl-CoA                | ZKWNQTHFKYUNU-JGCIYWTLSA-N   | [M+H] <sup>+</sup> | 1158.4        | 1157.3922  | Thermo LTQ Orbitrap, ESI                       | Orbitrap      | 30.00                | 4               | <a href="http://jb.asm.org/cgi/reprint/JB.00665-07v1">http://jb.asm.org/cgi/reprint/JB.00665-07v1</a>                                                                   |
| cis-4-Decenoyl-CoA        | QTOYQSMKQWCWOX-SGUJYKCESA-N  | [M-H] <sup>-</sup> | 918.5         | 919.2353   | ABI 3200 Q TRAP, ESI                           | Ion Trap      | 25.00                | 6               | <a href="http://dx.doi.org/10.1016/j.ab.2010.02.026">http://dx.doi.org/10.1016/j.ab.2010.02.026</a>                                                                     |
| DHOPDC-CoA                | KORUWOSZRLGRCN-UHFFFAOYSA-N  | [M+H] <sup>+</sup> | 1124.3        | 1123.3140  | Thermo LTQ Orbitrap, ESI                       | Orbitrap      | 30.00                | 4               | <a href="http://jb.asm.org/cgi/reprint/JB.00665-07v1">http://jb.asm.org/cgi/reprint/JB.00665-07v1</a>                                                                   |
| 2,6-dimethylheptanoyl-CoA | GPXWBKWDXPBLS-LNSOOWQSSA-N   | [M-H] <sup>-</sup> | 906.5         | 907.2353   | ABI 3200 Q TRAP, ESI                           | Ion Trap      | 25.00                | 6               | <a href="http://dx.doi.org/10.1016/j.ab.2010.02.026">http://dx.doi.org/10.1016/j.ab.2010.02.026</a>                                                                     |
| ethylmalonyl-CoA          | VUGZQVCBBEZQE-VRQRJWBYSAN    | [M+H] <sup>+</sup> | 882.3         | 881.1469   | Waters Micromass Quattro micro MS, ESI         | Triple Quad   | 30.00                | 3               | DOI: 10.1002/jms.1242                                                                                                                                                   |
| Flunoxapfen-CoA           | DFNKNUXNTARLIX-FWYROGSTSA-   | [M+H] <sup>+</sup> | 1035          | 1034.1848  | Thermo TSQ Quantum Max triple                  | Triple Quad   | 25.00                | 8               | DOI:10.1124/dmd.109.029371                                                                                                                                              |

|                                         |                             |                    |          |           |                                                      |             |       |    |                                                                                                                           |
|-----------------------------------------|-----------------------------|--------------------|----------|-----------|------------------------------------------------------|-------------|-------|----|---------------------------------------------------------------------------------------------------------------------------|
|                                         |                             |                    |          |           | quadrupole, ESI                                      |             |       |    |                                                                                                                           |
| Ibuprofen-CoA                           | ZWOQHSZKILPKKA-TWLYMIRPSA-J | [M+H] <sup>+</sup> | 956      | 1034.1848 | Thermo TSQ triple quadrupole, ESI                    | Triple Quad | 25.00 | 7  | <a href="http://pubs.acs.org/doi/abs/10.1021/tx800098h">http://pubs.acs.org/doi/abs/10.1021/tx800098h</a>                 |
| isobutyryl-CoA                          | AEWHYWSPVRZHCT-NDZSKPAWSA-N | [M-H] <sup>-</sup> | 836.1493 | 837.1571  | Waters Q-ToF Premier, ESI                            | Q-TOF       | 30.00 | 29 | <a href="http://www.massbank.jp/RecordDisplay?id=PR100154">http://www.massbank.jp/RecordDisplay?id=PR100154</a>           |
| isobutyryl-CoA                          | AEWHYWSPVRZHCT-NDZSKPAWSA-N | [M+H] <sup>+</sup> | 838.1649 | 837.1571  | Waters Q-ToF Premier, ESI                            | Q-TOF       | 30.00 | 14 | <a href="http://www.massbank.jp/RecordDisplay?id=PR100154">http://www.massbank.jp/RecordDisplay?id=PR100154</a>           |
| malonyl-CoA                             | LTYOQGRJFJAKNA-DVVLENMVSA-N | [M+H] <sup>+</sup> | 854.3    | 853.1156  | Waters Micromass Quattro micro MS, ESI               | Triple Quad | 30.00 | 3  | DOI: 10.1002/jms.1243                                                                                                     |
| malonyl-CoA                             | LTYOQGRJFJAKNA-DVVLENMVSA-N | [M+H] <sup>+</sup> | 854.1    | 853.1156  | ABI API 3000 triple quadrupole MS, ESI               | Triple Quad | 52.00 | 8  | <a href="http://dx.doi.org/10.1016/j.jchromb.2007.03.029">http://dx.doi.org/10.1016/j.jchromb.2007.03.029</a>             |
| methylmalonyl-CoA                       | MZFOKIKEPGUZEN-FBMOWMAESA-N | [M+H] <sup>+</sup> | 868.3    | 867.1313  | Waters Micromass Quattro micro MS, ESI               | Triple Quad | 30.00 | 4  | DOI: 10.1002/jms.1244                                                                                                     |
| oleoyl-CoA                              | XDUHQPOXLUAVEE-BPMMELMSSA-N | [M+H] <sup>+</sup> | 1032     | 1031.3605 | Thermo Quantum TSQ Ultra AM, ESI                     | Triple Quad | 30.00 | 7  | <a href="http://pubs.acs.org/doi/abs/10.1021/ac800031u">http://pubs.acs.org/doi/abs/10.1021/ac800031u</a>                 |
| 12-OPDA-CoA (12-oxo-phytyldienoic acid) | XQXACJRPGQJGP-LLHOYASASA-N  | [M-H] <sup>-</sup> | 1040.48  | 1041.3085 | Waters Micromass Q-ToF 2, ESI                        | Q-TOF       | 30.00 | 11 | <a href="http://www.jbc.org/content/280/14/13962.full.pdf+html">http://www.jbc.org/content/280/14/13962.full.pdf+html</a> |
| C16:0-CoA (pamitoyl)                    | MNBKLUUYKPBKDU-BBECNAHFSA-N | [M-H] <sup>-</sup> | 1004     | 1005.3449 | Thermo Finnigan TSQ 70, FAB                          | Triple Quad | 30.00 | 9  | <a href="http://dx.doi.org/10.1016/1044-0305(94)85057-7">http://dx.doi.org/10.1016/1044-0305(94)85057-7</a>               |
| Phenylacetyl-CoA (ZIGIFDRJFZYEEQ)       | ZIGIFDRJFZYEEQ-CECATXLMSA-N | [M+H] <sup>+</sup> | 886      | 885.1571  | Thermo TSQ Quantum Max triple quadrupole, ESI        | Triple Quad | 25.00 | 10 | 10.1124/dmd.108.026153                                                                                                    |
| 3-phenylpropionyl-CoA                   | HYSDRCZPYSOWME-FUEUKBNZSA-J | [M-H] <sup>-</sup> | 898.5    | 899.1727  | ABI 3200 Q TRAP, ESI                                 | Ion Trap    | 25.00 | 6  | <a href="http://dx.doi.org/10.1016/j.ab.2010.02.026">http://dx.doi.org/10.1016/j.ab.2010.02.026</a>                       |
| propionyl-CoA                           | QAQREVBBADEHPA-IEXPMLFSA-N  | [M+H] <sup>+</sup> | 824.7    | 823.1414  | Agilent MSD Ion trap mass spectrometer SL, 0.75V ESI | Ion Trap    | 0.75  | 5  | <a href="http://dx.doi.org/10.1016/j.jchromb.2008.12.053">http://dx.doi.org/10.1016/j.jchromb.2008.12.053</a>             |
| propionyl-CoA                           | QAQREVBBADEHPA-IEXPMLFSA-N  | [M+H] <sup>+</sup> | 824.7    | 823.1414  | Agilent MSD Ion trap mass spectrometer SL, 2.0V ESI  | Ion Trap    | 2.00  | 5  | <a href="http://dx.doi.org/10.1016/j.jchromb.2008.12.053">http://dx.doi.org/10.1016/j.jchromb.2008.12.053</a>             |
| propionyl-CoA                           | QAQREVBBADEHPA-IEXPMLFSA-N  | [M+H] <sup>+</sup> | 824.4    | 823.1414  | Waters Micromass Quattro micro MS, ESI               | Triple Quad | 30.00 | 3  | DOI: 10.1002/jms.1245                                                                                                     |
| CoA                                     | RGJOEKWQDUBAIZ-IBOSZNHSA-N  | [M+H] <sup>+</sup> | 768.3    | 767.1152  | Waters Micromass Quattro micro MS, ESI               | Triple Quad | 30.00 | 4  | DOI: 10.1002/jms.1246                                                                                                     |
| Simvastatin-CoA                         | GSLHKCYQBSJBRU-YUZZLLNMSA-N | [M-H] <sup>-</sup> | 1184.4   | 1185.3871 | Thermo LCQ ion trap, ESI                             | Ion Trap    | 15.00 | 8  | 10.1124/dmd.105.006650                                                                                                    |
| Dehydro-Simvastatin-CoA                 | ACRWQXYKQGECO-JZXWXTILOSAN  | [M-H] <sup>-</sup> | 1166.4   | 1167.3766 | Thermo LCQ ion trap, ESI                             | Ion Trap    | 15.00 | 8  | 10.1124/dmd.105.006650                                                                                                    |
| succinyl-CoA                            | VNOYUJKHFWYWR-ITIIDSSPSA-N  | [M+H] <sup>+</sup> | 868.6    | 867.1313  | Agilent MSD Ion trap mass spectrometer SL, ESI       | Ion Trap    | 1.00  | 4  | <a href="http://dx.doi.org/10.1016/j.jchromb.2008.12.053">http://dx.doi.org/10.1016/j.jchromb.2008.12.053</a>             |
| succinyl-CoA                            | VNOYUJKHFWYWR-ITIIDSSPSA-N  | [M+H] <sup>+</sup> | 868.3    | 867.1313  | Waters Micromass Quattro micro MS, ESI               | Triple Quad | 30.00 | 3  | DOI: 10.1002/jms.1247                                                                                                     |
| succinyl-CoA                            | VNOYUJKHFWYWR-ITIIDSSPSA-N  | [M+H] <sup>+</sup> | 868.1    | 867.1313  | ABI API 3000 triple quadrupole MS, ESI               | Triple Quad | 52.00 | 6  | <a href="http://dx.doi.org/10.1016/j.jchromb.2007.03.029">http://dx.doi.org/10.1016/j.jchromb.2007.03.029</a>             |

|                                                                     |                             |                    |        |           |                               |             |              |   |                                                                                                                             |
|---------------------------------------------------------------------|-----------------------------|--------------------|--------|-----------|-------------------------------|-------------|--------------|---|-----------------------------------------------------------------------------------------------------------------------------|
| Tolmetin-CoA                                                        | YININOOYERTLNN-UHFFFAOYSA-N | [M+H] <sup>+</sup> | 1007.2 | 1006.2098 | Agilent MSD ion trap, ESI     | Ion Trap    | Not Reported | 6 | <a href="http://dmd.aspetjournals.org/content/35/5/758.full.pdf">http://dmd.aspetjournals.org/content/35/5/758.full.pdf</a> |
| Valproyl-CoA                                                        | UCIOSJVVYJWBEO-XJJFWNASA-N  | [M+H] <sup>+</sup> | 894    | 893.2197  | Thermo TSQ Quantum ultra, ESI | Triple Quad | Not Reported | 7 | <a href="http://pubs.acs.org/doi/pdfplus/10.1021/tx0501785">http://pubs.acs.org/doi/pdfplus/10.1021/tx0501785</a>           |
| Zomepirac-CoA (5-(chlorobenzoyl)-1,4-dimethylpyrrole-2-acetic acid) | AMRKGEFTWMVRAR-UHFFFAOYSA-N | [M+H] <sup>+</sup> | 1041   | 1040.1709 | Thermo TSQ Quantum ultra, ESI | Triple Quad | Not Reported | 6 | <a href="http://pubs.acs.org/doi/pdfplus/10.1021/tx0501785">http://pubs.acs.org/doi/pdfplus/10.1021/tx0501785</a>           |

Figure S1: Head to tail MS2 matching results from MS DIAL for the 13 identified acyl-CoAs standards in positive ESI mode (a-m).

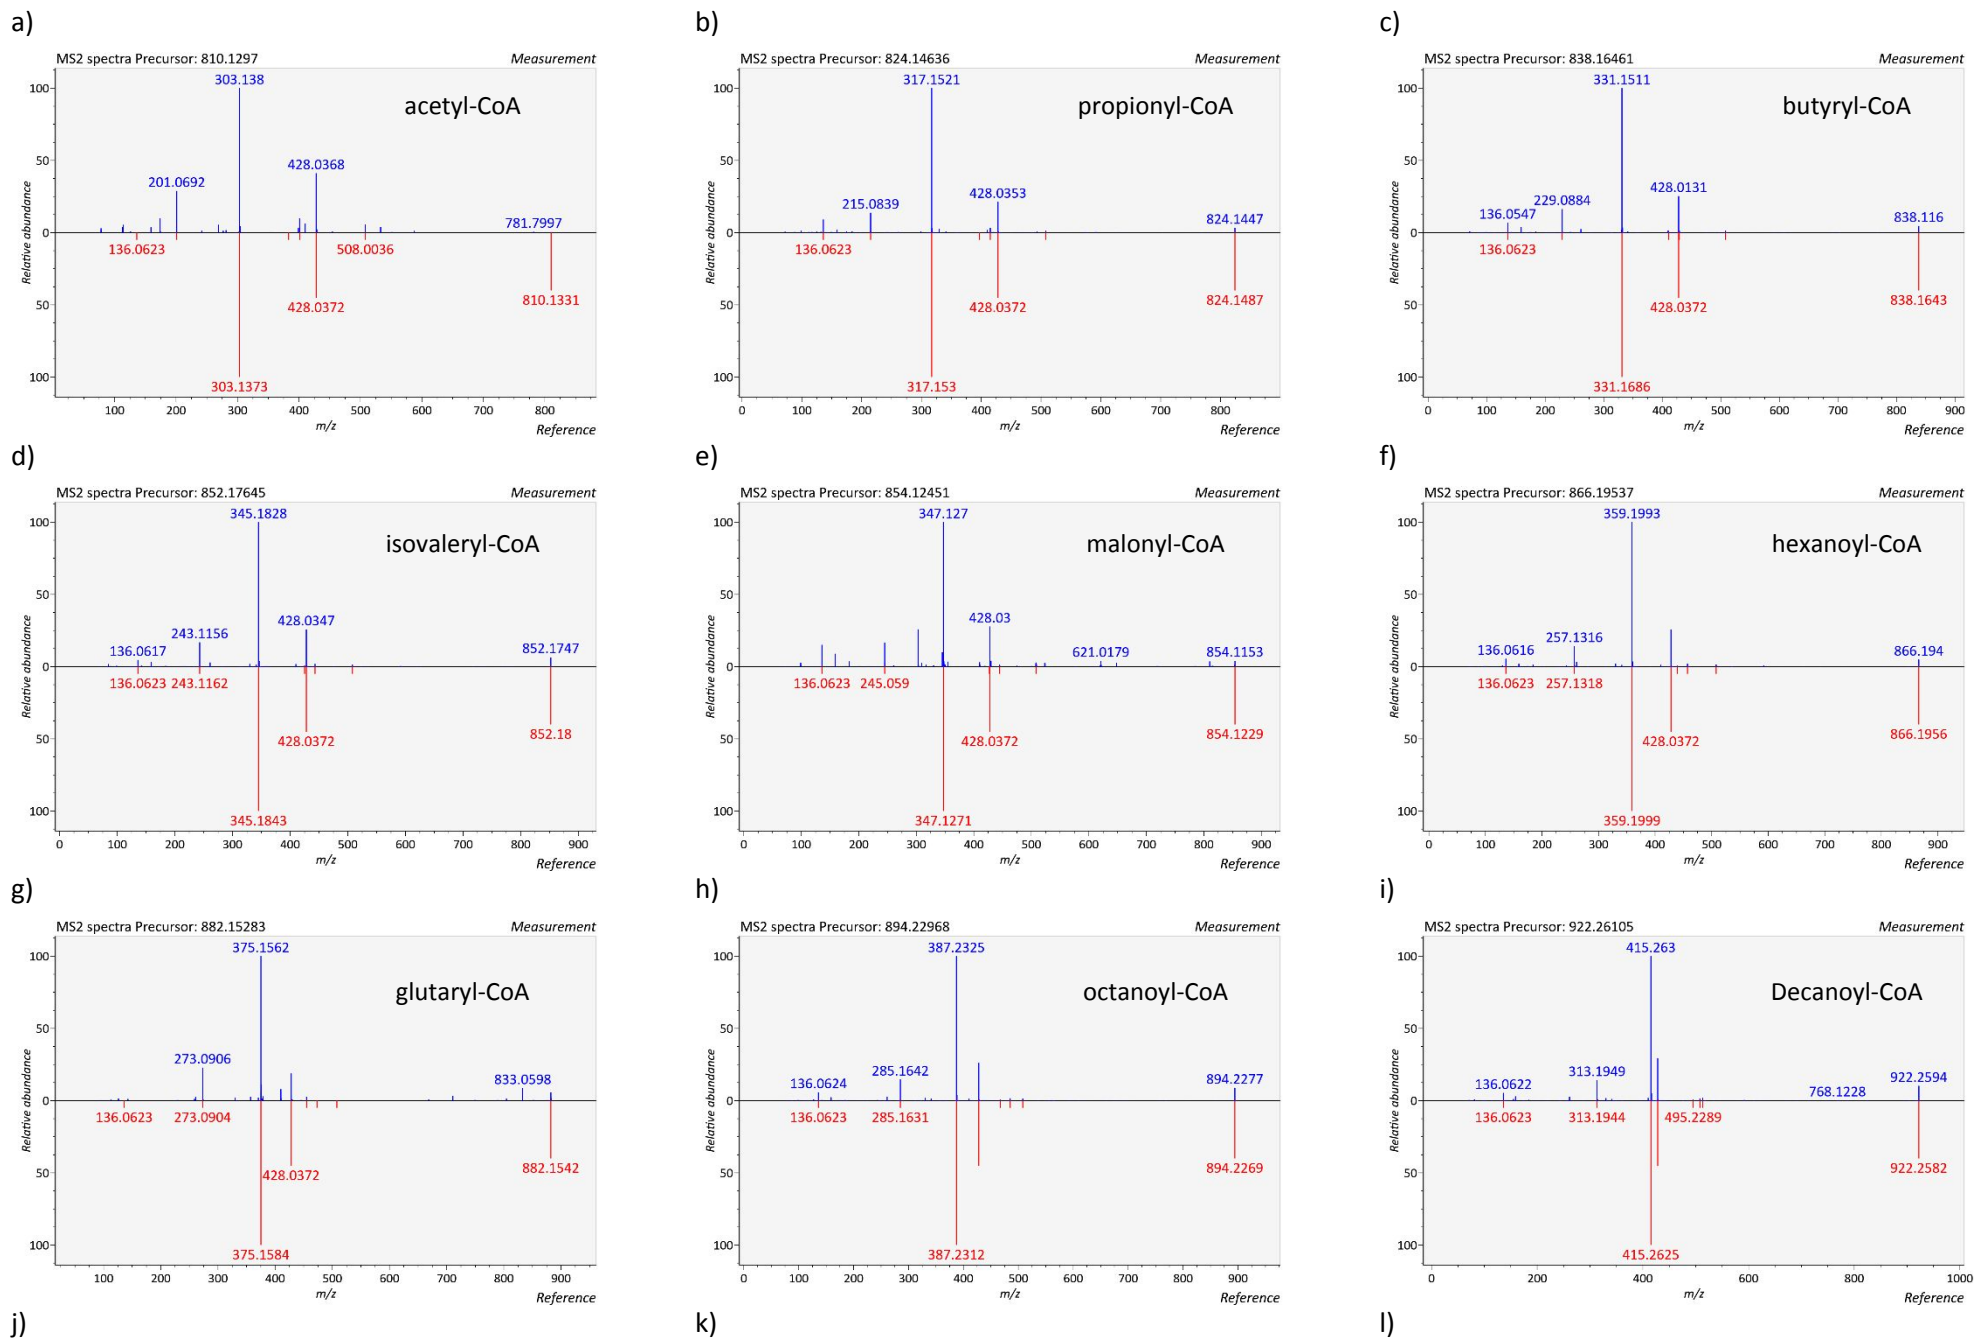



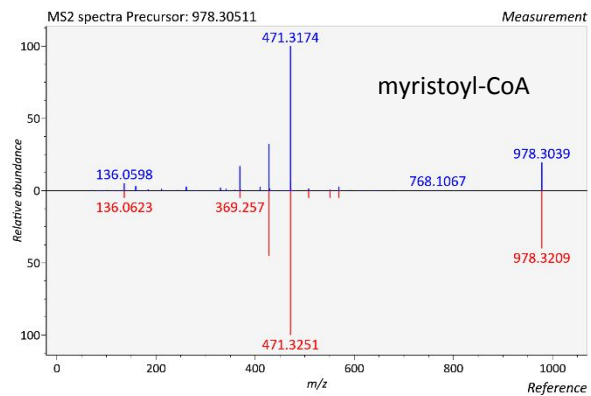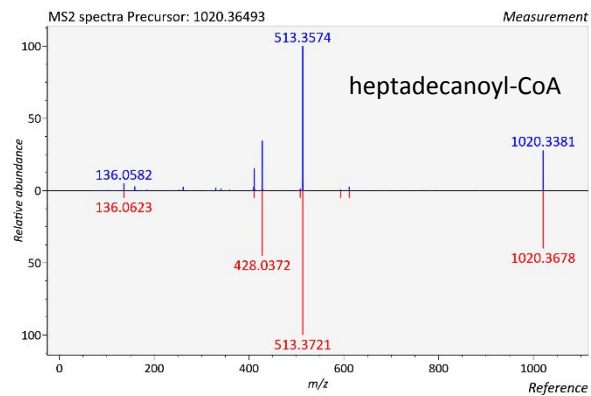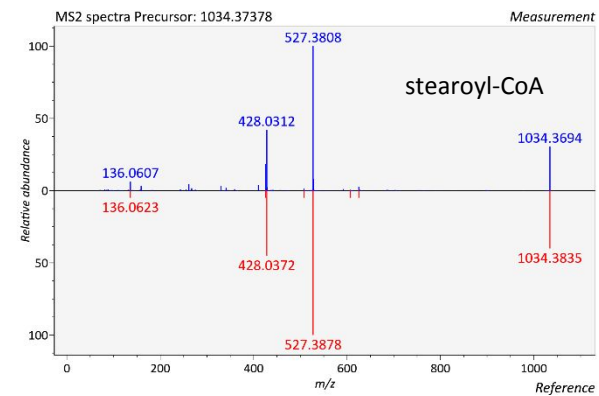

m)

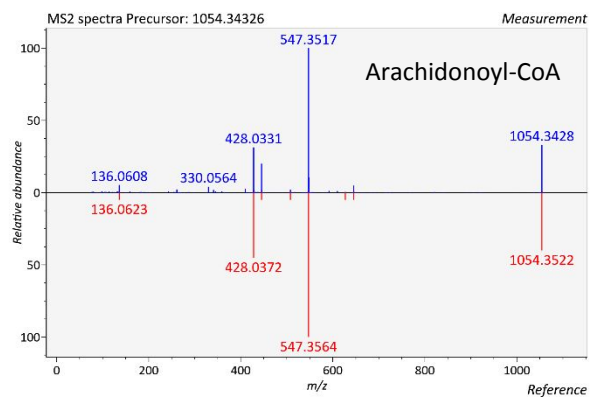

Figure S2: Head to tail MS2 matching results from MS DIAL for the 11 identified acyl-CoAs standards in negative ESI mode (a-k).

a)

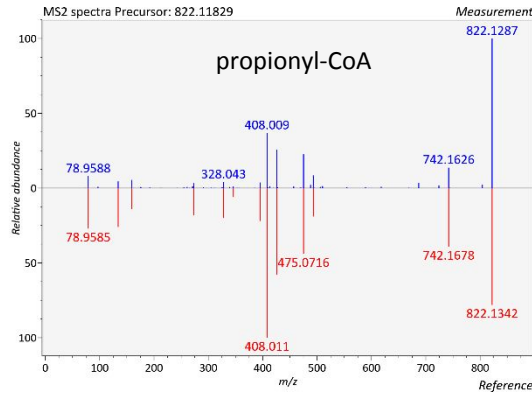

b)

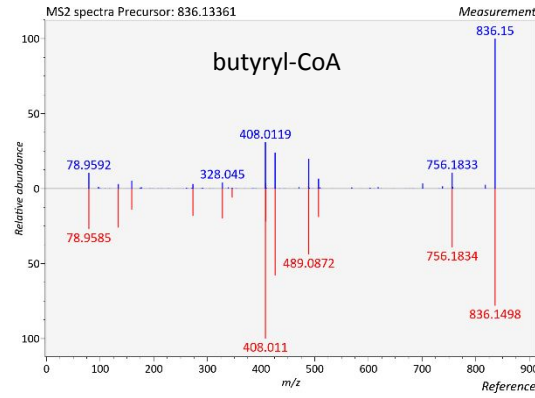

c)

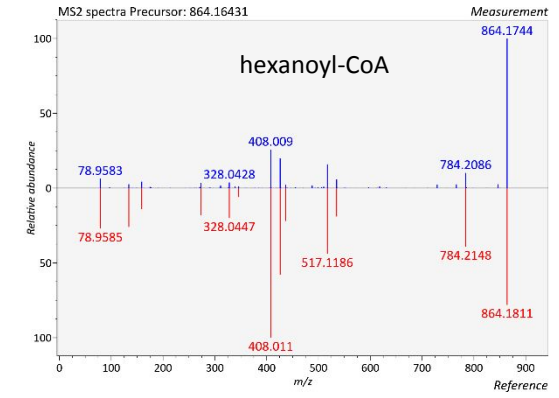

d)

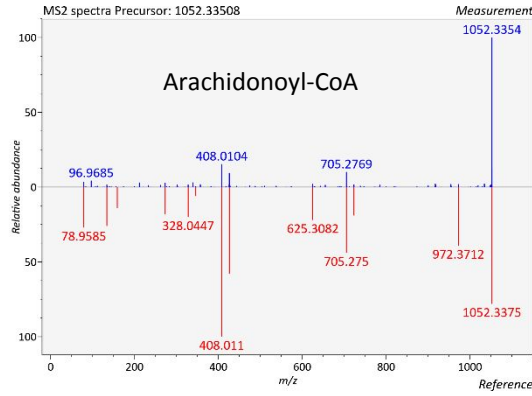

e)

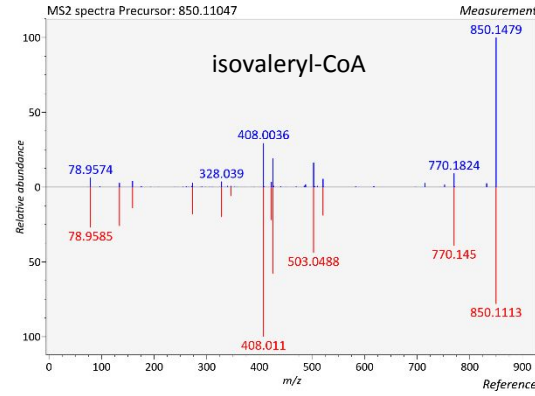

f)

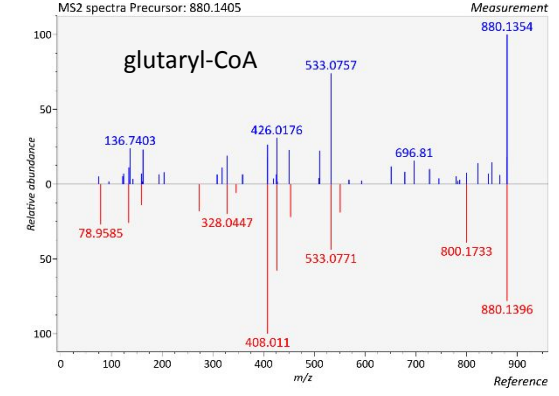

g)

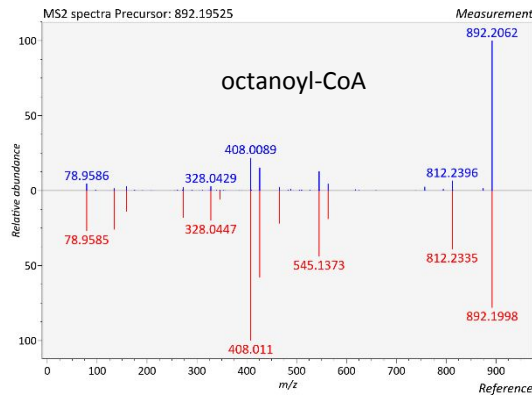

h)

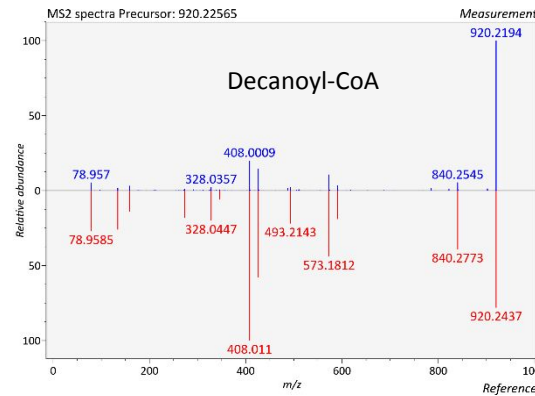

i)

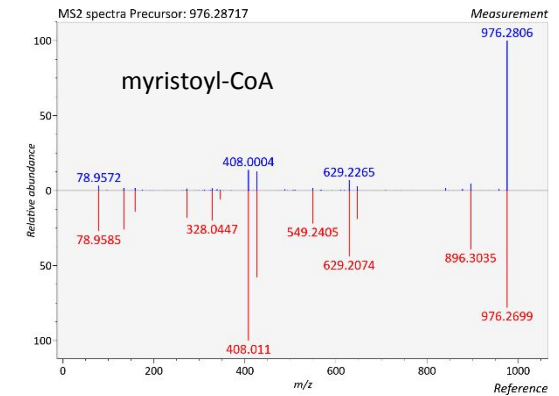

j)

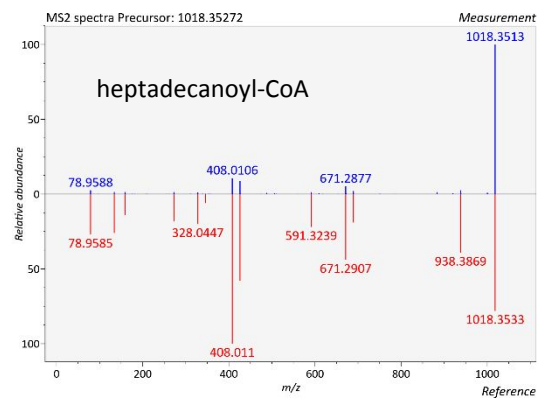

k)

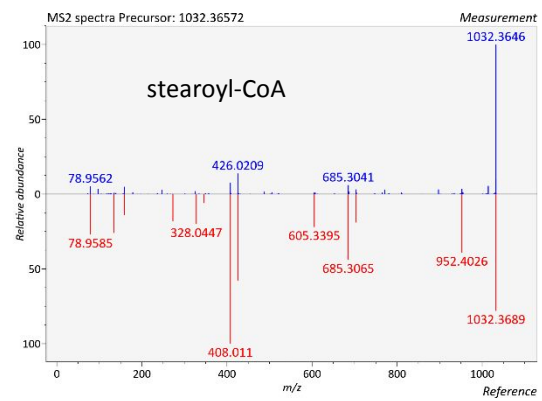

Figure S3: Head to tail MS2 matching results from MS DIAL for all 23 identified liver acyl-CoAs (a-w).

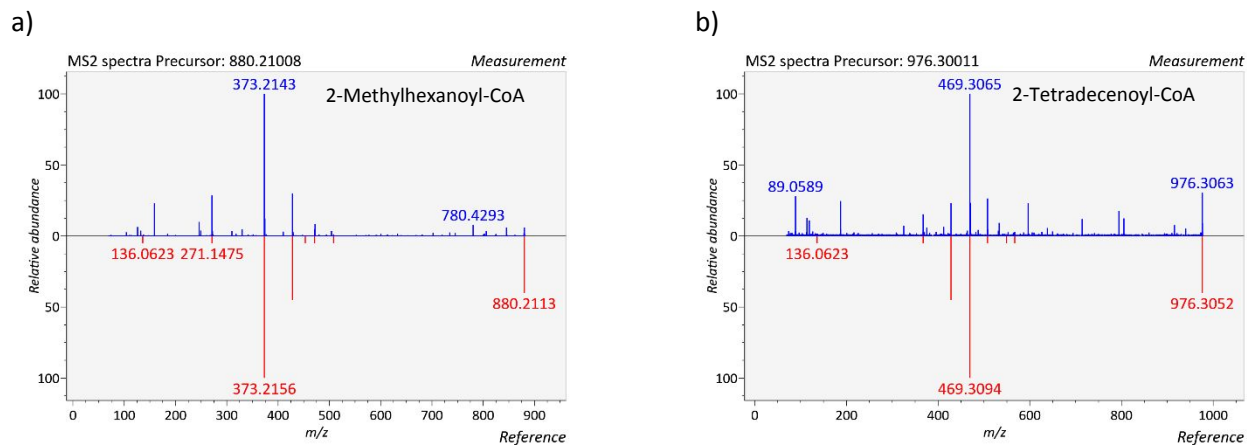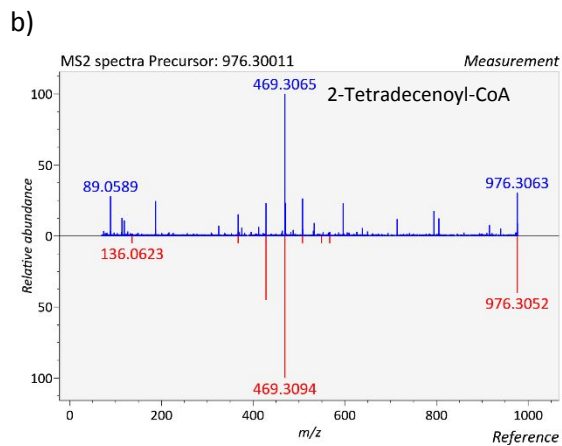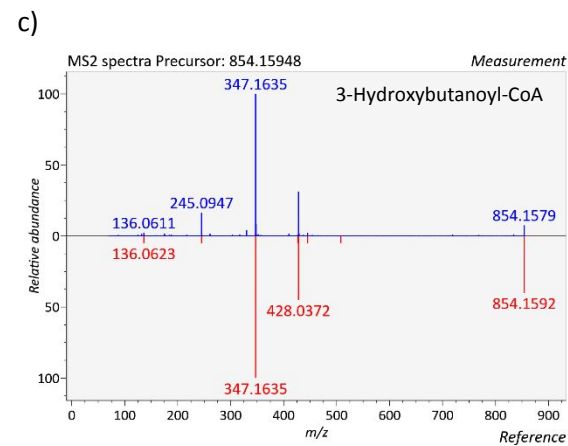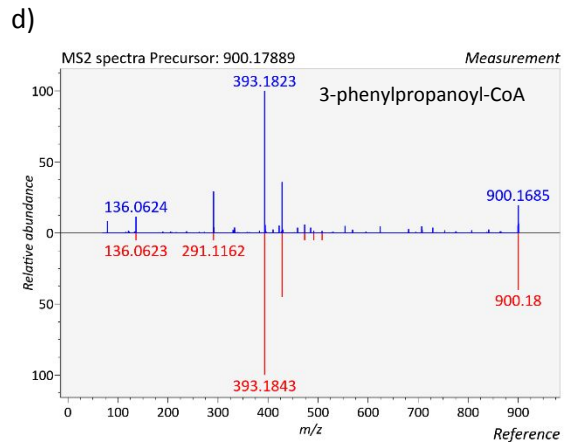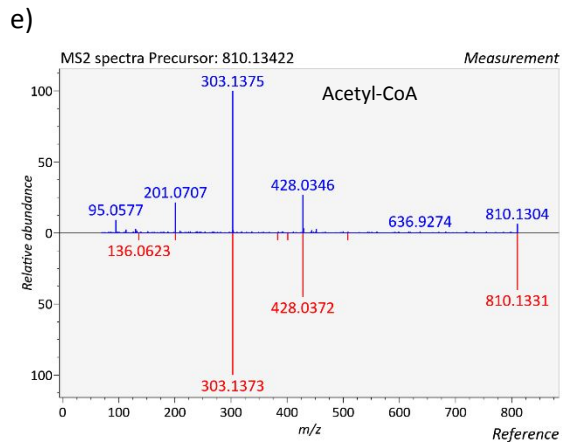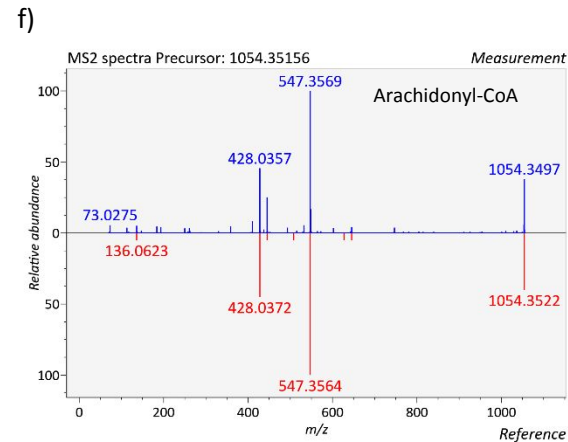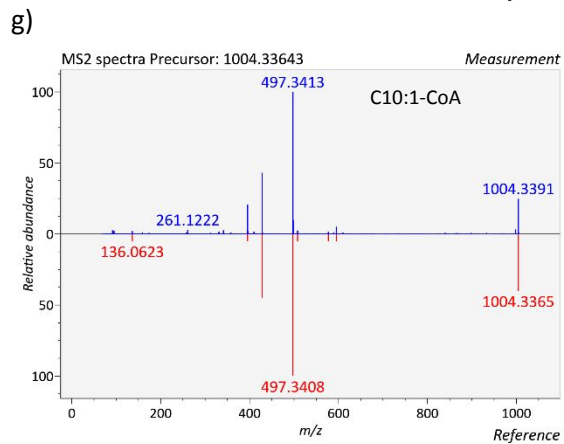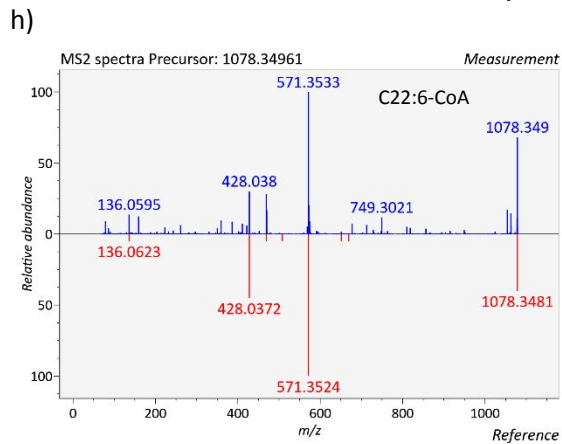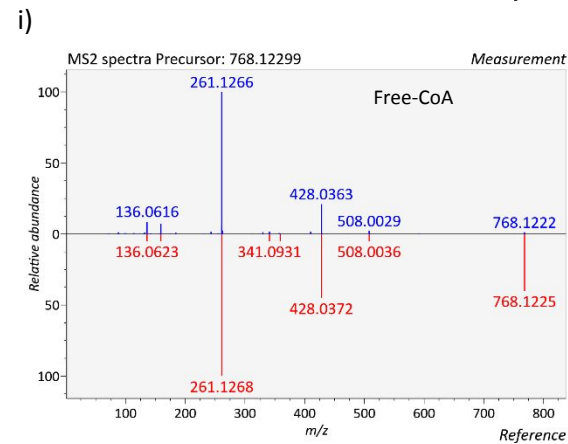

j)

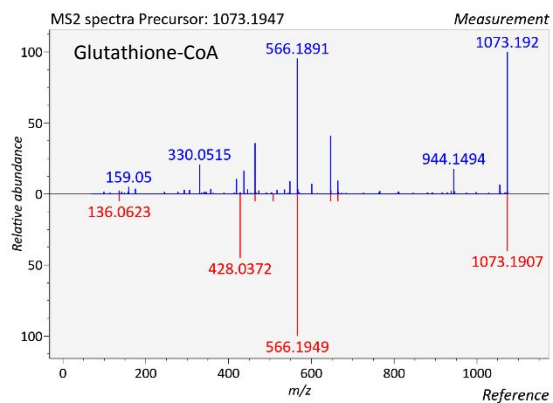

k)

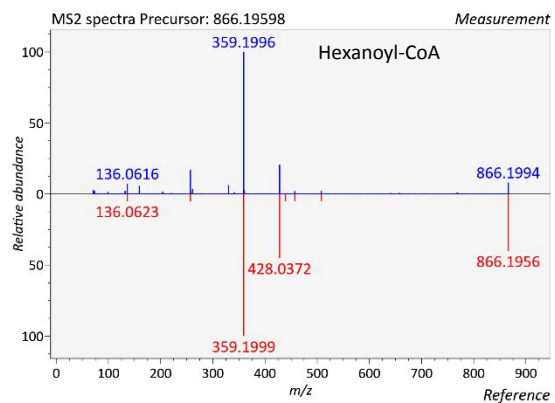

l)

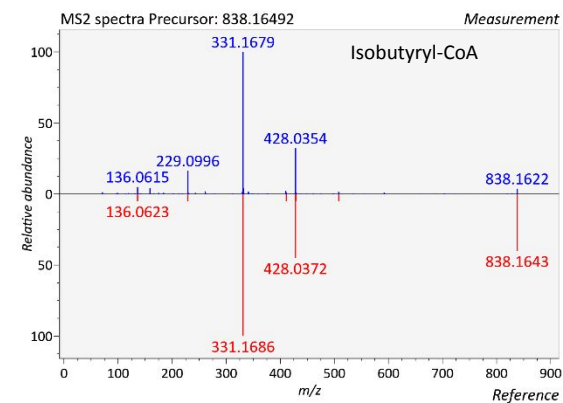

m)

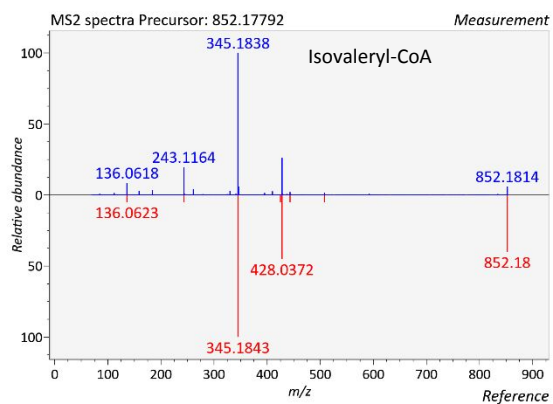

n)

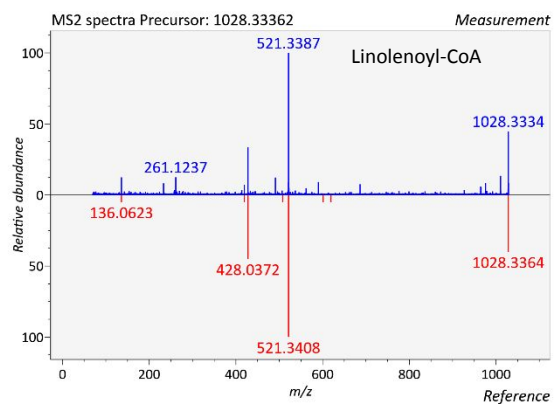

o)

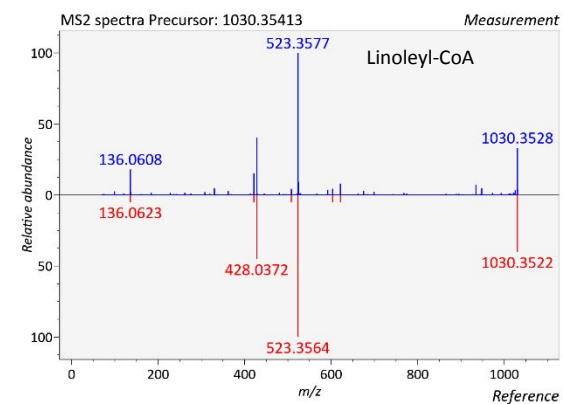

p)

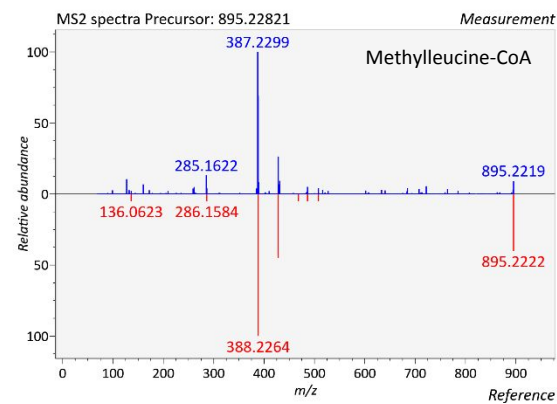

q)

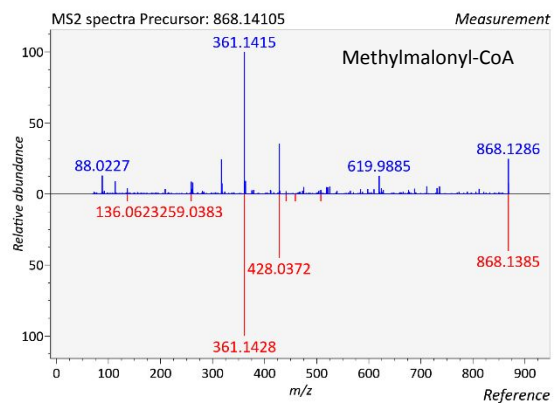

r)

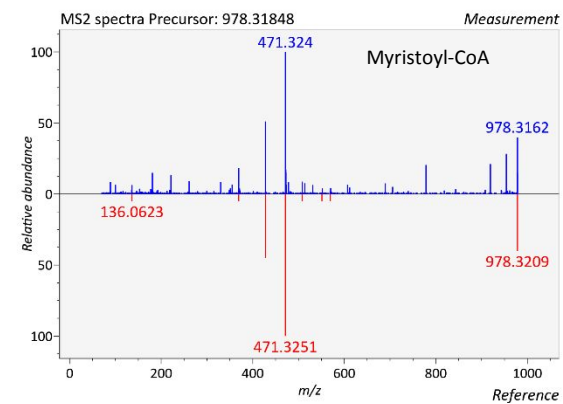

s)

t)

u)

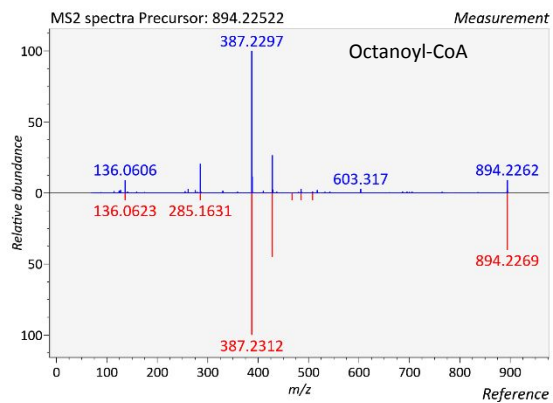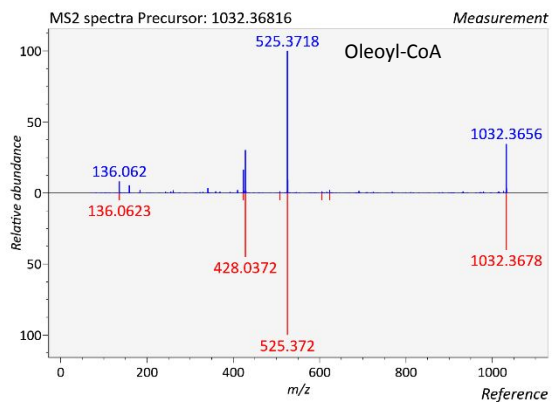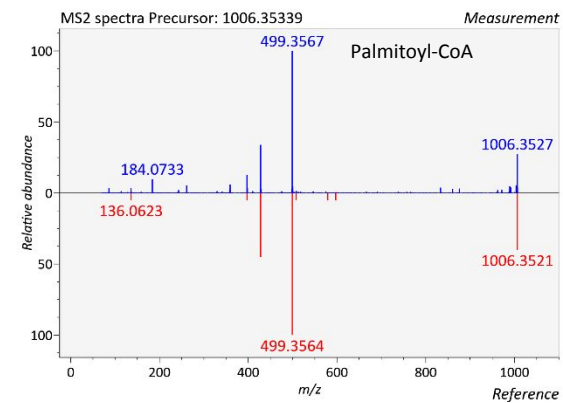

v)

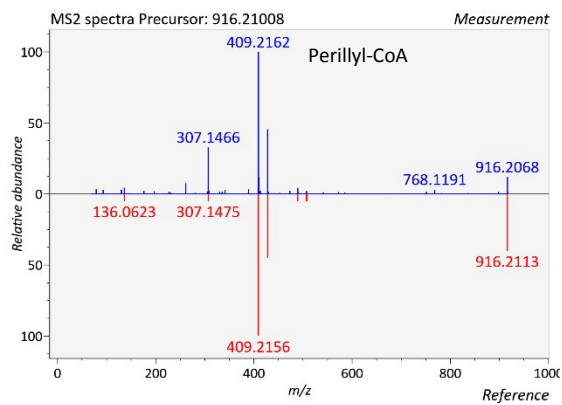

w)

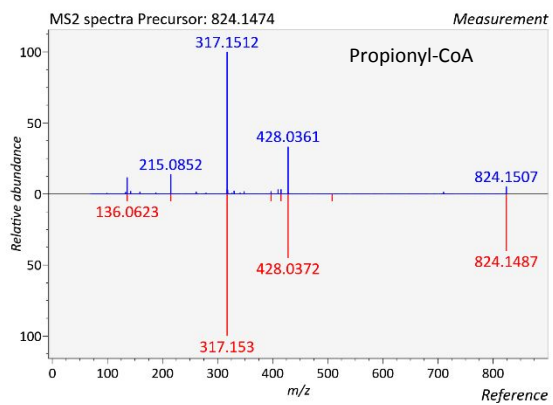

Supplement: NIHMS2027839-supplement-Supplement_Information.pdf [file NIHMS2027839-supplement-Supplement_Information.pdf]
